# Supplementary material for: Comparative efficacy and tolerability of front-line treatments for newly diagnosed chronic-phase chronic myeloid leukemia: an update network meta-analysis
Source: PubMed Central journal article supplement (PMC6714291; doi:10.1186/s12885-019-6039-9), 2019-08-28
Supplement: 12885_2019_6039_MOESM1_ESM.pdf [file 12885_2019_6039_MOESM1_ESM.pdf]

## **Additional file 1:**

Table S1 Supplementary characteristics of trials and patients in the 21 eligible RCTs (10187 patients).

Table S2 Risk of bias assessment.

Table S3 Efficacy and tolerability of all treatments according to pairwise estimates.

Table S4 Inconsistency evaluation.

Table S5 Efficacy and tolerability of all treatments according to Bayesian network meta-analysis.

Appendix 1 WinBUGS codes.

## Additional file 1

**Table S1 Supplementary characteristics of trials and patients in the 21 eligible RCTs (10187 patients).**

| Author<br>Year         | Treatment                            | Patients<br>(N) | ECOG Performance<br>Status (%) |      |     | Outcomes                    |                              |                                    |                                                |                                 |                    |
|------------------------|--------------------------------------|-----------------|--------------------------------|------|-----|-----------------------------|------------------------------|------------------------------------|------------------------------------------------|---------------------------------|--------------------|
|                        |                                      |                 | 0                              | 1    | 2   | MMR within 12<br>months (%) | CCyR within<br>12 months (%) | Overall<br>Discontinuat<br>ion (%) | Discontinuation<br>for drug-related<br>AEs (%) | Progression<br>to AP-CML<br>(%) | Serious<br>AEs (%) |
| O'Brien(1)<br>2003     | Imatinib 400mg QD                    | 553             | 77                             | 21   | 1   | 28.8                        | 73.8                         | 12.3                               | 2                                              | 6.9                             | /                  |
|                        | IFN- $\alpha$ + Ara-C                | 553             | 74                             | 21   | 2   | 0.17                        | 8.5                          | 31.6                               | 6                                              | 12.8                            | /                  |
| Cortes(1)<br>2009      | Imatinib 800mg QD                    | 319             | 76.5                           | 20.1 | 1.6 | 46.4                        | 69.9                         | 19.7                               | 10.0                                           | 1.9                             | 64.0               |
|                        | Imatinib 400mg QD                    | 157             | 79.0                           | 17.8 | 1.3 | 40.1                        | 65.6                         | 15.9                               | 4.4                                            | 3.2                             | 33.0               |
| Baccarani<br>2009      | Imatinib 800mg QD                    | 108             | /                              | /    | /   | 49                          | 64                           | /                                  | 16.7                                           | /                               | /                  |
|                        | Imatinib 400mg QD                    | 108             | /                              | /    | /   | 41                          | 58                           | /                                  | 9.3                                            | /                               | /                  |
| Preudhom<br>me<br>2010 | Imatinib 400mg QD                    | 159             | /                              | /    | /   | 38                          | 58                           | 34.6                               | 6.3                                            | /                               | /                  |
|                        | Imatinib 600mg QD                    | 160             | /                              | /    | /   | 49                          | 65                           | 36.3                               | 10.6                                           | /                               | /                  |
|                        | Imatinib 400mg QD +<br>Ara-C         | 158             | /                              | /    | /   | 46                          | 70                           | 93.1                               | 42.1                                           | /                               | /                  |
|                        | Imatinib 400mg QD +<br>IFN- $\alpha$ | 160             | /                              | /    | /   | 57                          | 66                           | 83.1                               | 60.6                                           | /                               | /                  |
| Saglio<br>2010         | Nilotinib 300mg BID                  | 282             | /                              | /    | /   | 55                          | 80                           | 21.6                               | 9.3                                            | 3.6                             | /                  |
|                        | Nilotinib 400mg BID                  | 281             | /                              | /    | /   | 51                          | 78                           | 25.3                               | 12.6                                           | 2.2                             | /                  |
|                        | Imatinib 400mg QD                    | 283             | /                              | /    | /   | 27                          | 65                           | 25.8                               | 10.4                                           | 7.5                             | /                  |

|                           |                                      |     |    |    |    |      |      |      |      |      |      |
|---------------------------|--------------------------------------|-----|----|----|----|------|------|------|------|------|------|
| Kantarjian<br>2010        | Dasatinib 100mg QD                   | 259 | 82 | 18 | 0  | 46   | 83   | 15.5 | 7    | 10.8 | /    |
|                           | Imatinib 400mg QD                    | 260 | 79 | 20 | 1  | 28   | 72   | 18.6 | 5    | 13.8 | /    |
| Petzer<br>2010            | Imatinib 800mg QD                    | 113 | /  | /  | /  | 32.1 | 61   | /    | /    | /    | /    |
|                           | Imatinib 400mg QD                    | 113 | /  | /  | /  | 25.4 | 36   | /    | /    | /    | /    |
| Cortes(2)<br>2011         | Bosutinib 500mg QD                   | 250 | 74 | 26 | 0  | 41   | 70   | 28.4 | 24   | 5    | 64   |
|                           | Imatinib 400mg QD                    | 252 | 72 | 28 | 0  | 27   | 68   | 19.8 | 7    | 2    | 48   |
| Hehlmann<br>(1)<br>2011   | Imatinib 800mg QD                    | 338 | 37 | 49 | 14 | 54.8 | 62.9 | 9.5  | /    | /    | /    |
|                           | Imatinib 400mg QD                    | 325 | 35 | 53 | 12 | 30.8 | 49.4 | 9.7  | /    | /    | /    |
|                           | Imatinib 400mg QD +<br>IFN- $\alpha$ | 351 | 34 | 55 | 11 | 34.7 | 49.7 | 7.4  | /    | /    | /    |
| Radich<br>2012            | Dasatinib 100mg QD                   | 123 | 58 | 39 | 3  | 59   | 84   | 20   | 13   | /    | 58   |
|                           | Imatinib 400mg QD                    | 123 | 63 | 36 | 1  | 44   | 69   | 28   | 10   | /    | 35   |
| Thielen<br>2013           | Imatinib 400mg QD                    | 55  | /  | /  | /  | 56   | 69   | 17.9 | 14   | /    | /    |
|                           | Imatinib 400mg QD +<br>Ara-C         | 54  | /  | /  | /  | 48   | 80   | 33.9 | 18   | /    | /    |
| Hughes<br>2014            | Nilotinib 400mg BID                  | 104 | /  | /  | /  | 32.7 | /    | 23.1 | 11.5 | /    | 14   |
|                           | Imatinib 400mg QD                    | 103 | /  | /  | /  | 13.5 | /    | 8.7  | 2.9  | /    | 11   |
| O'Brien(2)<br>2014        | Dasatinib 100mg QD                   | 407 | /  | /  | /  | 58.4 | 53.4 | 14.5 | 22.2 | /    | /    |
|                           | Imatinib 400mg QD                    | 407 | /  | /  | /  | 43.1 | 41.6 | 19.7 | 15.5 | /    | /    |
| Deininger<br>2014         | Imatinib 800mg QD                    | 73  | 68 | 31 | 1  | 53   | 85   | 31   | 17.8 | /    | 58   |
|                           | Imatinib 400mg QD                    | 72  | 61 | 35 | 4  | 36   | 67   | 233  | 8.2  | /    | 31   |
| Hjorth-Han<br>sen<br>2015 | Dasatinib 100mg QD                   | 22  | 41 | 54 | 5  | 80   | 100  | 36.3 | 32   | /    | 59.1 |
|                           | Imatinib 400mg QD                    | 24  | 29 | 58 | 13 | 47   | 95   | 29.1 | 29   | /    | 41.7 |
| Wang                      | Nilotinib 300mg BID                  | 134 | /  | /  | /  | 56   | 80.5 | 13.4 | 3    | /    | 68.4 |

|                         |                                          |     |    |    |     |      |      |      |      |     |      |
|-------------------------|------------------------------------------|-----|----|----|-----|------|------|------|------|-----|------|
| 2015                    | Imatinib 400mg QD                        | 133 | /  | /  | /   | 30.8 | 77.6 | 10.5 | 1.5  | /   | 59.8 |
| Kwak<br>2015            | Radotinib 300mg BID                      | 79  | 67 | 33 | 0   | 52   | 91   | 12.7 | 8.9  | /   | /    |
|                         | Radotinib 400mg BID                      | 81  | 68 | 31 | 1   | 46   | 82   | 28.4 | 19.8 | /   | /    |
|                         | Imatinib 400mg QD                        | 81  | 63 | 36 | 1   | 30   | 77   | 18.5 | 6.2  | /   | /    |
| Lipton<br>2016          | Ponatinib 45mg QD                        | 155 | 75 | 24 | 1   | 80   | /    | 15.5 | 9    | /   | /    |
|                         | Imatinib 400mg QD                        | 152 | 78 | 21 | 1   | 38   | /    | 7.2  | 1.3  | /   | /    |
| Cortes(3)<br>2016       | Nilotinib 400mg BID                      | 96  | 81 | 18 | 1   | 42   | 66   | 21.6 | 8.3  | 7   | 38   |
|                         | Imatinib 600mg QD                        | 95  | 84 | 15 | 1   | 19   | 40   | 36.5 | 3.8  | 4   | 31   |
| Hehlmann<br>(2)<br>2017 | Imatinib 400mg QD                        | 400 | 36 | 51 | 13  | 36.7 | 67.5 | /    | /    | 4.3 | 14.7 |
|                         | Imatinib 400mg QD +<br>IFN- $\alpha$     | 430 | 35 | 53 | 12  | 43.1 | 67.8 | /    | /    | 3.6 | 6.5  |
|                         | Imatinib 400mg QD +<br>Ara-C             | 158 | 35 | 51 | 14  | 29.6 | 53.6 | /    | /    | 5.7 | 6.3  |
|                         | Imatinib 400mg QD<br>after IFN- $\alpha$ | 128 | 38 | 62 | 1   | 10   | 25.7 | /    | /    | 5.1 | 1    |
|                         | Imatinib 800mg QD                        | 420 | 38 | 48 | 14  | 55.6 | 77.6 | /    | /    | 4.8 | 29.5 |
| Cortes(4)<br>2018       | Bosutinib 400mg QD                       | 268 | 71 | 29 | 0   | 47.2 | 77.7 | 22   | 12.7 | 0.4 | 56.3 |
|                         | Imatinib 400mg QD                        | 268 | 71 | 29 | 0.5 | 36.9 | 66.4 | 26.8 | 8.7  | 1.5 | 42.6 |

("/" means "not available")

**Table S2 Risk of bias assessment.**

| Source             | Adequate sequence generation ? | Allocation concealment? | Blinding? (Self-reported outcome) | Blinding? (Objective outcomes) | Incomplete outcome data addressed? | Free of selective reporting? | Other bias? |
|--------------------|--------------------------------|-------------------------|-----------------------------------|--------------------------------|------------------------------------|------------------------------|-------------|
| O'Brien(1) 2003    | Yes                            | Yes                     | Yes                               | Yes                            | Yes                                | Yes                          | Unclear     |
| Cortes(1) 2009     | Yes                            | Yes                     | Yes                               | Yes                            | Yes                                | Yes                          | Unclear     |
| Baccarani 2009     | Yes                            | Yes                     | Yes                               | Yes                            | Yes                                | Yes                          | Unclear     |
| Preudhomme 2010    | Yes                            | Yes                     | No                                | Yes                            | Yes                                | Yes                          | Unclear     |
| Saglio 2010        | Yes                            | Yes                     | Yes                               | Yes                            | Yes                                | Yes                          | Unclear     |
| Kantarjian 2010    | Yes                            | Yes                     | Yes                               | Yes                            | Yes                                | Yes                          | Unclear     |
| Petzer 2010        | Yes                            | Unclear                 | Unclear                           | Yes                            | Unclear                            | Yes                          | Unclear     |
| Cortes(2) 2011     | Yes                            | Yes                     | Yes                               | Yes                            | Yes                                | Yes                          | Unclear     |
| Hehlmann(1) 2011   | Yes                            | Yes                     | Unclear                           | Yes                            | Yes                                | Yes                          | Unclear     |
| Radich 2012        | Yes                            | Yes                     | Yes                               | Yes                            | Unclear                            | Yes                          | Unclear     |
| Thielen 2013       | Yes                            | Unclear                 | Yes                               | Yes                            | Yes                                | Yes                          | Unclear     |
| Hughes(2) 2014     | Yes                            | Yes                     | Yes                               | Yes                            | Yes                                | Yes                          | Unclear     |
| O'Brien(2) 2014    | Yes                            | Yes                     | Yes                               | Yes                            | Unclear                            | Yes                          | Unclear     |
| Deininger 2014     | Yes                            | Yes                     | Yes                               | Yes                            | Yes                                | Yes                          | Unclear     |
| Hjorth-Hansen 2015 | Yes                            | Yes                     | Unclear                           | Yes                            | Yes                                | Yes                          | Unclear     |
| Wang 2015          | Yes                            | Yes                     | Yes                               | Yes                            | Yes                                | Yes                          | Unclear     |
| Kwak 2015          | Yes                            | Yes                     | Yes                               | Yes                            | Yes                                | Yes                          | Unclear     |
| Lipton 2016        | Yes                            | Yes                     | Yes                               | Yes                            | Yes                                | Yes                          | Unclear     |
| Cortes(3) 2016     | Yes                            | Yes                     | Unclear                           | Yes                            | Unclear                            | Yes                          | Unclear     |
| Hehlmann(2) 2017   | No                             | No                      | Unclear                           | Unclear                        | Unclear                            | Yes                          | Unclear     |
| Cortes(4) 2018     | Yes                            | Yes                     | Yes                               | Yes                            | Unclear                            | Yes                          | Unclear     |

**Table S3 Efficacy and tolerability of all treatments according to pairwise estimates**

| Treatment                             | Studies (N) | Patients (N) | Efficacy OR (95% CI) |                       |                   | Tolerability OR (95% CI) |                                      |                  |
|---------------------------------------|-------------|--------------|----------------------|-----------------------|-------------------|--------------------------|--------------------------------------|------------------|
|                                       |             |              | MMR within 12 months | CCyR within 12 months | Progression to AP | Overall discontinuation  | Discontinuation for drug-related AEs | Serious AEs      |
| <b>vs Imatinib 400mg QD</b>           |             |              |                      |                       |                   |                          |                                      |                  |
| IFN- $\alpha$ + Ara-C                 | 1           | 1106         | 0.00(0.00, 0.03)     | 0.03(0.02, 0.05)      | 2.00(1.32, 3.02)  | 3.30(2.42, 4.51)         | 3.13(1.56, 6.26)                     | -                |
| Imatinib 600mg QD                     | 1           | 319          | 1.57(1.01, 2.45)     | 1.35(0.86, 2.12)      | -                 | 1.08(0.68, 1.70)         | 1.77(0.79, 4.00)                     | -                |
| Imatinib 800mg QD                     | 6           | 2546         | 1.82(1.39, 2.38)     | 1.60(1.21, 2.12)      | 0.97(0.54, 1.73)  | 1.00(0.41, 2.46)         | 2.83(1.49, 5.36)                     | 1.24(0.18, 8.38) |
| Imatinib 400mg QD + Ara-C             | 3           | 984          | 0.93(0.58, 1.50)     | 1.14(0.49, 2.69)      | 1.13(0.58, 1.73)  | 5.95(0.33, 106.31)       | 3.95(0.50,31.26)                     | 0.39(0.19, 0.78) |
| Imatinib 400mg QD + IFN- $\alpha$     | 3           | 1805         | 1.44(1.06, 1.97)     | 1.07(0.89, 1.30)      | 1.36(0.59, 3.12)  | 2.61(0.22, 31.61)        | 22.94(11.23, 46.87)                  | 0.40(0.25, 0.65) |
| Imatinib 400mg QD after IFN- $\alpha$ | 1           | 528          | 0.20(0.11, 0.36)     | 0.17(0.11, 0.26)      | 0.81(0.40, 1.65)  | -                        | -                                    | 0.12(0.01, 0.92) |
| Nilotinib 300mg BID                   | 2           | 832          | 1.24(1.084, 1.429)   | 1.16(1.07, 1.26)      | 0.48(0.23, 0.99)  | 0.92(0.59, 1.45)         | 0.96(0.57, 1.63)                     | 1.45(0.88, 2.40) |
| Nilotinib 400mg BID                   | 2           | 769          | 1.68(0.56, 5.07)     | 1.90(1.31, 2.76)      | 1.30(0.53, 3.22)  | 1.64(0.53, 5.15)         | 2.01(0.61, 6.65)                     | 1.27(0.98, 1.63) |
| Dasatinib 100mg QD                    | 4           | 1625         | 1.44(1.29, 1.60)     | 1.34(1.25, 1.44)      | 0.78(0.49, 1.24)  | 0.74(0.58, 0.96)         | 1.48(1.11, 1.98)                     | 1.54(1.02, 2.31) |
| Bosutinib 400mg QD                    | 1           | 502          | 1.51(1.07, 2.14)     | 1.75(1.20, 2.57)      | 0.25(0.03, 2.23)  | 0.77(0.52, 1.14)         | 1.55(0.89, 2.71)                     | 1.74(1.24, 2.45) |
| Bosutinib 500mg QD                    | 1           | 536          | 1.90(1.30, 2.76)     | 1.11(0.76, 1.61)      | 2.71(0.95, 7.72)  | 1.60(1.06, 2.42)         | 4.11(2.34, 7.19)                     | 1.92(1.35, 2.75) |
| Radotinib 300mg BID                   | 1           | 160          | 2.56(1.34, 4.91)     | 3.15(1.24, 8.00)      | -                 | 0.64(0.27, 1.52)         | 0.14(0.01, 2.81)                     | -                |
| Radotinib 400mg BID                   | 1           | 162          | 2.00(1.05, 3.81)     | 1.35(0.63, 2.89)      | -                 | 1.75(0.83, 3.66)         | 2.08(0.50, 8.62)                     | -                |
| Ponatinib 45mg QD                     | 1           | 307          | 6.48(3.89, 10.82)    | -                     | -                 | 2.35(1.11, 4.98)         | 7.50(1.67, 33.60)                    | -                |
| <b>vs Imatinib 600mg QD</b>           |             |              |                      |                       |                   |                          |                                      |                  |
| Nilotinib 400mg BID                   | 1           | 191          | 3.06(1.59, 5.88)     | 2.86(1.59, 5.16)      | 1.79(0.51, 6.33)  | 0.48(0.25,0.91)          | 0.09(0.14, 1.66)                     | 1.37(0.75, 2.49) |
| Imatinib 400mg QD + Ara-C             | 1           | 318          | 0.90(0.58, 1.40)     | 1.27(0.79, 2.04)      | -                 | 23.50(11.76,46.96)       | 0.74(0.09, 0.29)                     | -                |

|                                                       |   |      |                  |                  |                  |                   |                  |                  |
|-------------------------------------------------------|---|------|------------------|------------------|------------------|-------------------|------------------|------------------|
| Imatinib 400mg QD + IFN- $\alpha$                     | 1 | 320  | 1.39(0.89, 2.15) | 1.06(0.67, 1.68) | -                | 8.66(5.13, 14.64) | 1.54(0.04, 0.14) | -                |
| <b>vs Imatinib 800mg QD</b>                           |   |      |                  |                  |                  |                   |                  |                  |
| Imatinib 400mg QD + Ara-C                             | 1 | 578  | 0.34(0.23, 0.50) | 0.34(0.23, 0.49) | 1.21(0.54, 2.71) | -                 | -                | 2.30(0.97, 5.43) |
| Imatinib 400 mg QD + IFN- $\alpha$                    | 2 | 1188 | 0.52(0.38,0.70)  | 0.59(0.48, 0.74) | 0.72(0.36, 1.43) | 0.76(0.45, 1.31)  | -                | 2.37(1.19, 4.72) |
| Imatinib 400 mg QD after IFN- $\alpha$                | 1 | 548  | 0.09(0.05, 0.16) | 0.10(0.06, 0.16) | 1.16(0.48, 2.80) | -                 | -                | 0.27(0.03, 2.08) |
| <b>vs Imatinib 400mg QD + Ara-C</b>                   |   |      |                  |                  |                  |                   |                  |                  |
| Imatinib 400mg QD + IFN- $\alpha$                     | 1 | 588  | 1.78(1.21, 2.64) | 1.82(1.25, 2.64) | 0.60(0.26, 1.40) | 0.37(0.18, 0.77)  | 1.54(0.31, 0.75) | 1.03(0.49, 2.17) |
| Imatinib 400mg QD after IFN- $\alpha$                 | 1 | 286  | 0.27(0.14, 0.52) | 0.30(0.18, 0.49) | 0.96(0.35, 2.65) | -                 | -                | 0.12(0.01, 0.92) |
| <b>vs Imatinib 400mg QD + IFN-<math>\alpha</math></b> |   |      |                  |                  |                  |                   |                  |                  |
| Imatinib 400mg QD after IFN- $\alpha$                 | 1 | 558  | 0.15(0.08, 0.27) | 1.00(0.57, 1.75) | 1.60(0.64, 4.02) | -                 | -                | 0.11(0.02, 0.84) |
| <b>vs Nilotinib 300mg BID</b>                         |   |      |                  |                  |                  |                   |                  |                  |
| Nilotinib 400mg BID                                   | 1 | 563  | 0.85(0.61, 1.18) | 0.88(0.58, 1.31) | 0.59(0.21, 1.66) | 1.22(0.83, 1.81)  | 1.40(0.82, 2.40) | -                |
| <b>vs Radotinib 300mg BID</b>                         |   |      |                  |                  |                  |                   |                  |                  |
| Radotinib 400mg BID                                   | 1 | 160  | 0.78(0.42, 1.45) | 0.43(0.16, 1.11) | -                | 2.74(1.20, 6.22)  | 0.25(0.22, 0.73) | -                |

("-" means "cannot be estimated for lack of primary data")

## Table S4 Inconsistency evaluation

Inconsistency evaluation was estimated by the **node-splitting method** which generates P values for the null hypothesis that there is no significant inconsistency between direct and indirect evidence. “P > 0.05” and “Inconsistency factors include 0” means no significant inconsistency.

“A” to “O” refer to each treatment. ( A: Imatinib 400mg QD; B: Imatinib 600mg QD; C: Imatinib 800mg QD; D: IFN- $\alpha$  + Ara-C; E: Imatinib 400mg QD + Ara-C; F: Imatinib 400mg QD + IFN- $\alpha$ ; G: Nilotinib 300mg BID; H: Nilotinib 400mg BID; I: Dasatinib 100mg QD; J: Radotinib 300mg BID; K: Radotinib 400mg BID; L: Bosutinib 400mg QD; M: Bosutinib 500mg QD; N: Ponatinib 45mg QD; O: Imatinib 400mg QD after IFN- $\alpha$ .)

### (A) MMR within 12 months

| Name | Direct Effect        | Indirect Effect      | Overall              | P-Value |
|------|----------------------|----------------------|----------------------|---------|
| A, B | 0.24 (-0.37, 0.97)   | -0.08 (-1.05, 0.86)  | 0.05 (-0.44, 0.51)   | 0.57    |
| A, H | 1.05 (0.58, 1.56)    | 1.21 (0.27, 2.23)    | 1.08 (0.67, 1.50)    | 0.78    |
| B, E | -0.07 (-0.70, 0.52)  | -0.47 (-1.12, 0.18)  | -0.24 (-0.76, 0.28)  | 0.31    |
| B, F | 0.38 (-0.27, 0.97)   | 0.02 (-0.56, 0.59)   | 0.18 (-0.32, 0.69)   | 0.33    |
| B, H | 1.13 (0.35, 1.98)    | 0.95 (0.23, 1.70)    | 1.03 (0.51, 1.59)    | 0.71    |
| C, E | -1.08 (-1.70, -0.44) | -0.72 (-1.23, -0.16) | -0.86 (-1.27, -0.46) | 0.34    |
| C, F | -0.59 (-1.00, -0.25) | -0.15 (-0.73, 0.46)  | -0.45 (-0.76, -0.08) | 0.16    |
| E, F | 0.50 (0.09, 0.93)    | 0.14 (-0.46, 0.74)   | 0.41 (0.03, 0.83)    | 0.24    |
| G, H | -0.16 (-0.73, 0.46)  | 0.01 (-0.77, 0.83)   | -0.10 (-0.57, 0.40)  | 0.69    |

| Cycle      | Inconsistency factor Median (95% CI) |
|------------|--------------------------------------|
| A, B, H    | 0.00 (-0.53, 0.58)                   |
| A, B, G, H | 0.05 (-0.41, 0.63)                   |
| A, C, E    | -0.09 (-0.82, 0.43)                  |
| A, C, E    | -0.09 (-0.82, 0.43)                  |
| A, C, E, F | -0.10 (-0.75, 0.47)                  |
| A, C, E, F | -0.10 (-0.75, 0.47)                  |
| C, E, F    | 0.15 (-0.20, 0.61)                   |

### (b) CCyR within 12 months

| Name | Direct Effect        | Indirect Effect     | Overall              | P-Value |
|------|----------------------|---------------------|----------------------|---------|
| A, B | 0.19 (-0.61, 1.07)   | -0.53 (-1.70, 0.68) | -0.11 (-0.71, 0.50)  | 0.28    |
| A, H | 0.62 (-0.17, 1.44)   | 1.11 (-0.02, 2.26)  | 0.71 (0.09, 1.30)    | 0.45    |
| B, E | 0.31 (-0.38, 0.96)   | -0.32 (-0.98, 0.45) | 0.07 (-0.57, 0.75)   | 0.17    |
| B, F | 0.09 (-0.78, 0.93)   | 0.25 (-0.56, 1.07)  | 0.21 (-0.43, 0.85)   | 0.75    |
| B, H | 1.08 (0.18, 2.00)    | 0.50 (-0.59, 1.54)  | 0.81 (0.15, 1.47)    | 0.37    |
| C, E | -1.07 (-1.65, -0.53) | -0.13 (-0.67, 0.36) | -0.64 (-1.13, -0.12) | 0.02    |
| C, F | -0.51 (-1.06, 0.04)  | -0.59 (-1.39, 0.23) | -0.51 (-0.94, -0.07) | 0.88    |
| E, F | 0.22 (-0.40, 0.85)   | 0.05 (-0.90, 0.92)  | 0.13 (-0.38, 0.62)   | 0.70    |



|      |                     |                    |                    |      |
|------|---------------------|--------------------|--------------------|------|
| G, H | -0.08 (-0.88, 0.67) | 0.59 (-0.71, 1.88) | 0.09 (-0.57, 0.79) | 0.33 |
|------|---------------------|--------------------|--------------------|------|

| Cycle      | Inconsistency factor Median (95% CI) |
|------------|--------------------------------------|
| A, B, H    | -0.00 (-0.53, 0.58)                  |
| A, B, G, H | 0.03 (-0.33, 0.95)                   |
| A, C, E    | -0.01 (-0.76, 0.47)                  |
| A, C, E    | -0.01 (-0.76, 0.47)                  |
| A, C, E, F | 0.00 (-0.57, 0.63)                   |
| A, C, E, F | 0.00 (-0.57, 0.63)                   |
| C, E, F    | -0.00 (-0.44, 0.51)                  |

(c) Progression to AP-CML: No cycle

(d) Serious AEs: No cycle

(e) Overall discontinuation

| Name | Direct Effect       | Indirect Effect      | Overall             | P-Value |
|------|---------------------|----------------------|---------------------|---------|
| A, B | -0.02 (-1.92, 2.02) | 1.28 (-1.08, 3.74)   | -0.13 (-1.68, 1.37) | 0.36    |
| A, H | 0.52 (-0.91, 1.96)  | -1.59 (-4.28, 1.08)  | 0.10 (-1.23, 1.40)  | 0.14    |
| B, E | 3.16 (1.16, 5.26)   | 0.73 (-1.94, 3.27)   | 2.14 (0.34, 3.98)   | 0.12    |
| B, F | 2.12 (0.46, 3.78)   | -0.39 (-2.33, 1.66)  | 1.03 (-0.71, 2.79)  | 0.05    |
| B, H | -0.74 (-2.78, 1.29) | 1.44 (-0.77, 3.74)   | 0.24 (-1.37, 1.84)  | 0.13    |
| C, F | -0.29 (-1.96, 1.44) | 1.83 (-0.06, 3.64)   | 0.48 (-1.16, 2.05)  | 0.09    |
| E, F | -0.81 (-2.64, 0.89) | -2.57 (-4.47, -0.53) | -1.10 (-2.89, 0.65) | 0.17    |
| G, H | 0.20 (-2.01, 2.47)  | 0.06 (-2.45, 2.59)   | 0.09 (-1.57, 1.76)  | 0.92    |

| Cycle            | Inconsistency factor Median (95% CI) |
|------------------|--------------------------------------|
| A, C, F          | -0.02 (-2.21, 2.09)                  |
| A, C, F          | -0.02 (-2.21, 2.09)                  |
| A, B, C, F, H    | -0.48 (-3.31, 0.84)                  |
| A, B, C, F, G, H | -0.10 (-2.37, 1.32)                  |
| A, C, E, F       | 0.45 (-0.82, 2.99)                   |

(f) Discontinuation for drug-related AEs

| Name | Direct Effect      | Indirect Effect     | Overall            | P-Value |
|------|--------------------|---------------------|--------------------|---------|
| A, B | 0.30 (-1.03, 1.93) | -0.16 (-2.11, 1.99) | 0.03 (-1.00, 1.18) | 0.68    |
| A, H | 0.62 (-0.30, 1.85) | 0.99 (-1.37, 3.06)  | 0.70 (-0.06, 1.70) | 0.75    |
| B, E | 1.88 (1.11, 2.77)  | -0.11 (-1.42, 1.45) | 1.57 (0.24, 2.58)  | 0.02    |
| B, H | 0.80 (-0.96, 2.65) | 0.61 (-1.00, 2.51)  | 0.66 (-0.43, 1.91) | 0.89    |
| G, H | 0.29 (-0.92, 1.50) | 1.20 (-0.53, 2.83)  | 0.45 (-0.62, 1.59) | 0.31    |

| <b>Cycle</b>  | <b>Inconsistency factor Median (95% CI)</b> |
|---------------|---------------------------------------------|
| A, B, G, H    | 0.95 (-0.54, 2.24)                          |
| A, B, E, G, H | -0.71 (-2.34, 0.62)                         |
| A, G, H       | -0.90 (-2.49, 0.24)                         |

**Table S5 Efficacy and tolerability of all treatments according to Bayesian network meta-analysis**

**(a) MMR within 12 months**

|                               |                               |                               |                      |                                 |                               |                                 |                                 |                                |                                 |                               |                               |                               |                                  |                                             |
|-------------------------------|-------------------------------|-------------------------------|----------------------|---------------------------------|-------------------------------|---------------------------------|---------------------------------|--------------------------------|---------------------------------|-------------------------------|-------------------------------|-------------------------------|----------------------------------|---------------------------------------------|
| Imatinib<br>400mg QD          | 1.05 (0.65,<br>1.67)          | 1.96 (1.49,<br>2.48)          | 0.00 (0.00,<br>0.02) | 0.83 (0.56,<br>1.19)            | 1.25 (0.91,<br>1.72)          | 3.24 (2.10,<br>4.95)            | 2.95 (1.95,<br>4.47)            | 2.06 (1.51,<br>2.97)           | 2.59 (1.16,<br>5.75)            | 2.01 (0.92,<br>4.49)          | 1.51 (0.85,<br>2.73)          | 1.88 (1.03,<br>3.47)          | 6.67 (3.30,<br>13.29)            | 0.18 (0.09,<br>0.37)                        |
| 0.96 (0.60,<br>1.55)          | Imatinib<br>600mg QD          | 1.87 (1.10,<br>3.12)          | 0.00 (0.00,<br>0.02) | 0.79 (0.47,<br>1.32)            | 1.19 (0.72,<br>2.00)          | 3.08 (1.67,<br>5.74)            | 2.81 (1.66,<br>4.92)            | 1.98 (1.14,<br>3.63)           | 2.44 (0.99,<br>6.35)            | 1.91 (0.78,<br>4.91)          | 1.44 (0.70,<br>3.14)          | 1.80 (0.85,<br>3.92)          | 6.23 (2.76,<br>14.84)            | 0.18 (0.07,<br>0.40)                        |
| 0.51 (0.40,<br>0.67)          | 0.54 (0.32,<br>0.91)          | Imatinib<br>800mg QD          | 0.00 (0.00,<br>0.01) | 0.42 (0.28,<br>0.63)            | 0.64 (0.47,<br>0.92)          | 1.66 (1.01,<br>2.77)            | 1.50 (0.94,<br>2.50)            | 1.05 (0.72,<br>1.69)           | 1.32 (0.58,<br>3.11)            | 1.02 (0.46,<br>2.43)          | 0.77 (0.42,<br>1.51)          | 0.96 (0.51,<br>1.90)          | 3.38 (1.63,<br>7.13)             | 0.09 (0.04,<br>0.19)                        |
| 302.56<br>(51.19,<br>4111.48) | 313.50<br>(49.36,<br>4377.39) | 588.80<br>(99.19,<br>7836.26) | IFN + Ara-C          | 249.74<br>(40.67,<br>3429.57)   | 380.31<br>(62.20,<br>5265.31) | 981.73<br>(156.86,<br>13641.65) | 896.95<br>(143.78,<br>12260.57) | 632.83<br>(103.57,<br>8822.02) | 793.41<br>(106.17,<br>12296.72) | 613.89<br>(84.50,<br>9426.49) | 466.09<br>(70.27,<br>6540.84) | 578.18<br>(87.08,<br>8398.08) | 2007.28<br>(294.80,<br>30945.78) | 55.26 (7.89,<br>795.17)                     |
| 1.21 (0.84,<br>1.77)          | 1.27 (0.76,<br>2.15)          | 2.36 (1.58,<br>3.54)          | 0.00 (0.00,<br>0.02) | Imatinib<br>400mg QD<br>+ Ara-C | 1.51 (1.03,<br>2.30)          | 3.90 (2.25,<br>6.94)            | 3.56 (2.09,<br>6.24)            | 2.51 (1.54,<br>4.32)           | 3.10 (1.31,<br>7.75)            | 2.43 (1.02,<br>5.94)          | 1.83 (0.93,<br>3.72)          | 2.28 (1.16,<br>4.72)          | 7.98 (3.67,<br>17.70)            | 0.22 (0.10,<br>0.47)                        |
| 0.80 (0.58,<br>1.10)          | 0.84 (0.50,<br>1.38)          | 1.56 (1.09,<br>2.14)          | 0.00 (0.00,<br>0.02) | 0.66 (0.43,<br>0.97)            | Imatinib<br>400mg QD +<br>IFN | 2.58 (1.51,<br>4.35)            | 2.34 (1.41,<br>3.87)            | 1.65 (1.06,<br>2.65)           | 2.03 (0.87,<br>4.91)            | 1.60 (0.69,<br>3.77)          | 1.21 (0.62,<br>2.36)          | 1.50 (0.77,<br>2.99)          | 5.23 (2.46,<br>11.34)            | 0.14 (0.07,<br>0.29)                        |
| 0.31 (0.20,<br>0.48)          | 0.32 (0.17,<br>0.60)          | 0.60 (0.36,<br>0.99)          | 0.00 (0.00,<br>0.01) | 0.26 (0.14,<br>0.44)            | 0.39 (0.23,<br>0.66)          | Nilotinib<br>300mg BID          | 0.91 (0.57,<br>1.50)            | 0.64 (0.38,<br>1.14)           | 0.79 (0.33,<br>1.99)            | 0.62 (0.26,<br>1.55)          | 0.47 (0.23,<br>0.98)          | 0.58 (0.28,<br>1.25)          | 2.03 (0.91,<br>4.69)             | 0.06 (0.02,<br>0.13)                        |
| 0.34 (0.22,<br>0.51)          | 0.36 (0.20,<br>0.60)          | 0.67 (0.40,<br>1.06)          | 0.00 (0.00,<br>0.01) | 0.28 (0.16,<br>0.48)            | 0.43 (0.26,<br>0.71)          | 1.10 (0.67,<br>1.77)            | Nilotinib<br>400mg<br>BID       | 0.70 (0.42,<br>1.21)           | 0.89 (0.36,<br>2.15)            | 0.68 (0.28,<br>1.68)          | 0.51 (0.25,<br>1.06)          | 0.64 (0.31,<br>1.33)          | 2.26 (1.01,<br>4.98)             | 0.06 (0.03,<br>0.14)                        |
| 0.48 (0.34,<br>0.66)          | 0.51 (0.28,<br>0.88)          | 0.95 (0.59,<br>1.39)          | 0.00 (0.00,<br>0.01) | 0.40 (0.23,<br>0.65)            | 0.61 (0.38,<br>0.94)          | 1.56 (0.88,<br>2.65)            | 1.43 (0.82,<br>2.40)            | Dasatinib<br>100mg QD          | 1.25 (0.52,<br>2.96)            | 0.97 (0.40,<br>2.25)          | 0.74 (0.36,<br>1.42)          | 0.91 (0.45,<br>1.78)          | 3.22 (1.45,<br>6.82)             | 0.09 (0.04,<br>0.19)                        |
| 0.39 (0.17,<br>0.86)          | 0.41 (0.16,<br>1.01)          | 0.76 (0.32,<br>1.73)          | 0.00 (0.00,<br>0.01) | 0.32 (0.13,<br>0.76)            | 0.49 (0.20,<br>1.15)          | 1.27 (0.50,<br>3.05)            | 1.13 (0.46,<br>2.78)            | 0.80 (0.34,<br>1.93)           | Radotinib<br>300mg BID          | 0.78 (0.35,<br>1.68)          | 0.58 (0.22,<br>1.59)          | 0.72 (0.27,<br>1.98)          | 2.58 (0.87,<br>7.30)             | 0.07 (0.02,<br>0.21)                        |
| 0.50 (0.22,<br>1.09)          | 0.52 (0.20,<br>1.29)          | 0.98 (0.41,<br>2.19)          | 0.00 (0.00,<br>0.01) | 0.41 (0.17,<br>0.98)            | 0.62 (0.27,<br>1.45)          | 1.60 (0.64,<br>3.92)            | 1.47 (0.59,<br>3.57)            | 1.04 (0.44,<br>2.47)           | 1.28 (0.59,<br>2.83)            | Radotinib<br>300mg BID        | 0.75 (0.28,<br>2.03)          | 0.94 (0.35,<br>2.55)          | 3.27 (1.13,<br>9.55)             | 0.09 (0.03,<br>0.27)                        |
| 0.66 (0.37,<br>1.18)          | 0.70 (0.32,<br>1.43)          | 1.30 (0.66,<br>2.37)          | 0.00 (0.00,<br>0.01) | 0.55 (0.27,<br>1.07)            | 0.83 (0.42,<br>1.62)          | 2.14 (1.02,<br>4.41)            | 1.96 (0.94,<br>4.00)            | 1.36 (0.70,<br>2.75)           | 1.72 (0.63,<br>4.60)            | 1.33 (0.49,<br>3.56)          | Bosutinib<br>400mg QD         | 1.24 (0.54,<br>2.89)          | 4.40 (1.75,<br>10.79)            | 0.12 (0.05,<br>0.30)                        |
| 0.53 (0.29,<br>0.97)          | 0.55 (0.26,<br>1.18)          | 1.04 (0.53,<br>1.95)          | 0.00 (0.00,<br>0.01) | 0.44 (0.21,<br>0.86)            | 0.67 (0.33,<br>1.30)          | 1.72 (0.80,<br>3.59)            | 1.57 (0.75,<br>3.21)            | 1.10 (0.56,<br>2.22)           | 1.38 (0.50,<br>3.74)            | 1.06 (0.39,<br>2.86)          | 0.81 (0.35,<br>1.86)          | Bosutinib<br>500mg QD         | 3.54 (1.40,<br>8.63)             | 0.10 (0.04,<br>0.25)                        |
| 0.15 (0.08,<br>0.30)          | 0.16 (0.07,<br>0.36)          | 0.30 (0.14,<br>0.61)          | 0.00 (0.00,<br>0.00) | 0.13 (0.06,<br>0.27)            | 0.19 (0.09,<br>0.41)          | 0.49 (0.21,<br>1.10)            | 0.44 (0.20,<br>0.99)            | 0.31 (0.15,<br>0.69)           | 0.39 (0.14,<br>1.15)            | 0.31 (0.10,<br>0.89)          | 0.23 (0.09,<br>0.57)          | 0.28 (0.12,<br>0.71)          | Ponatinib<br>45mg QD             | 0.03 (0.01,<br>0.08)                        |
| 5.53 (2.71,<br>11.38)         | 5.71 (2.52,<br>13.67)         | 10.72 (5.22,<br>22.54)        | 0.02 (0.00,<br>0.13) | 4.51 (2.14,<br>9.86)            | 6.90 (3.39,<br>14.60)         | 17.81 (7.78,<br>41.68)          | 16.22<br>(7.15,<br>37.66)       | 11.45 (5.26,<br>25.82)         | 14.51 (4.85,<br>42.10)          | 11.07 (3.77,<br>32.65)        | 8.42 (3.31,<br>21.17)         | 10.46 (4.07,<br>26.28)        | 36.33<br>(13.24,<br>100.98)      | Imatinib<br>400mg QD<br>after IFN- $\alpha$ |

**(b) CCyR within 12 months**

|                         |                         |                          |                      |                                 |                               |                          |                          |                          |                           |                          |                          |                         |                                             |
|-------------------------|-------------------------|--------------------------|----------------------|---------------------------------|-------------------------------|--------------------------|--------------------------|--------------------------|---------------------------|--------------------------|--------------------------|-------------------------|---------------------------------------------|
| Imatinib<br>400mg QD    | 0.90 (0.49,<br>1.65)    | 1.83 (1.35,<br>2.57)     | 0.03 (0.02,<br>0.07) | 0.97 (0.63,<br>1.54)            | 1.10 (0.76,<br>1.67)          | 1.84 (1.01,<br>3.21)     | 2.03 (1.09,<br>3.68)     | 1.89 (1.23,<br>3.05)     | 3.37 (1.09,<br>11.18)     | 1.39 (0.51,<br>3.76)     | 1.77 (0.81,<br>3.78)     | 1.09 (0.50,<br>2.38)    | 0.20 (0.10,<br>0.39)                        |
| 1.12 (0.61,<br>2.03)    | Imatinib<br>600mg QD    | 2.03 (1.07,<br>3.99)     | 0.04 (0.01,<br>0.10) | 1.08 (0.57,<br>2.11)            | 1.23 (0.65,<br>2.34)          | 2.03 (0.92,<br>4.39)     | 2.25 (1.17,<br>4.34)     | 2.09 (1.00,<br>4.54)     | 3.76 (1.02,<br>14.11)     | 1.54 (0.47,<br>4.96)     | 1.97 (0.74,<br>5.11)     | 1.22 (0.47,<br>3.26)    | 0.22 (0.09,<br>0.52)                        |
| 0.55 (0.39,<br>0.74)    | 0.49 (0.25,<br>0.94)    | Imatinib<br>800mg QD     | 0.02 (0.01,<br>0.04) | 0.53 (0.32,<br>0.88)            | 0.60 (0.39,<br>0.93)          | 1.00 (0.51,<br>1.85)     | 1.10 (0.55,<br>2.13)     | 1.03 (0.60,<br>1.81)     | 1.84 (0.57,<br>6.31)      | 0.76 (0.26,<br>2.15)     | 0.96 (0.41,<br>2.17)     | 0.60 (0.25,<br>1.38)    | 0.11 (0.05,<br>0.21)                        |
| 30.77 (14.13,<br>64.45) | 27.83 (10.47,<br>70.97) | 56.07 (24.89,<br>127.31) | IFN + Ara-C          | 29.91 (12.65,<br>72.38)         | 33.95 (14.63,<br>79.40)       | 56.67 (21.15,<br>142.01) | 62.06 (23.33,<br>158.48) | 57.97 (24.23,<br>144.77) | 104.66 (26.59,<br>403.52) | 42.95 (12.14,<br>148.27) | 54.58 (18.19,<br>154.56) | 33.58 (11.52,<br>97.34) | 5.97 (2.16,<br>16.57)                       |
| 1.03 (0.65,<br>1.59)    | 0.93 (0.47,<br>1.77)    | 1.89 (1.13,<br>3.11)     | 0.03 (0.01,<br>0.08) | Imatinib<br>400mg QD +<br>Ara-C | 1.14 (0.68,<br>1.86)          | 1.88 (0.89,<br>3.77)     | 2.08 (0.99,<br>4.15)     | 1.94 (1.05,<br>3.68)     | 3.45 (1.04,<br>12.28)     | 1.43 (0.47,<br>4.26)     | 1.82 (0.73,<br>4.30)     | 1.12 (0.45,<br>2.75)    | 0.20 (0.09,<br>0.41)                        |
| 0.91 (0.60,<br>1.32)    | 0.81 (0.43,<br>1.53)    | 1.66 (1.08,<br>2.57)     | 0.03 (0.01,<br>0.07) | 0.88 (0.54,<br>1.47)            | Imatinib<br>400mg QD +<br>IFN | 1.66 (0.81,<br>3.23)     | 1.83 (0.91,<br>3.66)     | 1.70 (0.94,<br>3.18)     | 3.08 (0.91,<br>10.70)     | 1.26 (0.42,<br>3.69)     | 1.60 (0.66,<br>3.72)     | 0.99 (0.41,<br>2.36)    | 0.18 (0.08,<br>0.35)                        |
| 0.54 (0.31,<br>0.99)    | 0.49 (0.23,<br>1.08)    | 1.00 (0.54,<br>1.98)     | 0.02 (0.01,<br>0.05) | 0.53 (0.27,<br>1.12)            | 0.60 (0.31,<br>1.23)          | Nilotinib<br>300mg BID   | 1.10 (0.56,<br>2.20)     | 1.03 (0.52,<br>2.22)     | 1.86 (0.53,<br>6.94)      | 0.76 (0.24,<br>2.42)     | 0.97 (0.38,<br>2.49)     | 0.60 (0.23,<br>1.59)    | 0.11 (0.04,<br>0.27)                        |
| 0.49 (0.27,<br>0.91)    | 0.44 (0.23,<br>0.86)    | 0.91 (0.47,<br>1.83)     | 0.02 (0.01,<br>0.04) | 0.48 (0.24,<br>1.01)            | 0.55 (0.27,<br>1.10)          | 0.91 (0.45,<br>1.77)     | Nilotinib<br>400mg BID   | 0.93 (0.45,<br>2.03)     | 1.67 (0.47,<br>6.32)      | 0.69 (0.21,<br>2.24)     | 0.87 (0.32,<br>2.32)     | 0.54 (0.20,<br>1.45)    | 0.10 (0.04,<br>0.24)                        |
| 0.53 (0.33,<br>0.81)    | 0.48 (0.22,<br>1.00)    | 0.97 (0.55,<br>1.66)     | 0.02 (0.01,<br>0.04) | 0.51 (0.27,<br>0.95)            | 0.59 (0.31,<br>1.06)          | 0.97 (0.45,<br>1.92)     | 1.07 (0.49,<br>2.21)     | Dasatinib<br>100mg QD    | 1.78 (0.51,<br>6.29)      | 0.74 (0.24,<br>2.19)     | 0.93 (0.37,<br>2.25)     | 0.58 (0.24,<br>1.39)    | 0.10 (0.04,<br>0.23)                        |
| 0.30 (0.09,<br>0.92)    | 0.27 (0.07,<br>0.98)    | 0.54 (0.16,<br>1.75)     | 0.01 (0.00,<br>0.04) | 0.29 (0.08,<br>0.96)            | 0.32 (0.09,<br>1.10)          | 0.54 (0.14,<br>1.87)     | 0.60 (0.16,<br>2.15)     | 0.56 (0.16,<br>1.94)     | Radotinib<br>300mg BID    | 0.41 (0.12,<br>1.28)     | 0.52 (0.13,<br>2.00)     | 0.33 (0.08,<br>1.27)    | 0.06 (0.01,<br>0.22)                        |
| 0.72 (0.27,<br>1.96)    | 0.65 (0.20,<br>2.11)    | 1.32 (0.47,<br>3.78)     | 0.02 (0.01,<br>0.08) | 0.70 (0.23,<br>2.14)            | 0.79 (0.27,<br>2.37)          | 1.32 (0.41,<br>4.19)     | 1.46 (0.45,<br>4.68)     | 1.36 (0.46,<br>4.15)     | 2.46 (0.78,<br>8.30)      | Radotinib<br>400mg BID   | 1.26 (0.37,<br>4.47)     | 0.79 (0.23,<br>2.81)    | 0.14 (0.04,<br>0.47)                        |
| 0.57 (0.26,<br>1.24)    | 0.51 (0.20,<br>1.34)    | 1.04 (0.46,<br>2.44)     | 0.02 (0.01,<br>0.05) | 0.55 (0.23,<br>1.38)            | 0.62 (0.27,<br>1.51)          | 1.04 (0.40,<br>2.66)     | 1.15 (0.43,<br>3.10)     | 1.07 (0.44,<br>2.73)     | 1.93 (0.50,<br>7.79)      | 0.79 (0.22,<br>2.71)     | Bosutinib<br>400mg QD    | 0.62 (0.21,<br>1.87)    | 0.11 (0.04,<br>0.31)                        |
| 0.92 (0.42,<br>2.02)    | 0.82 (0.31,<br>2.15)    | 1.68 (0.73,<br>3.97)     | 0.03 (0.01,<br>0.09) | 0.89 (0.36,<br>2.22)            | 1.01 (0.42,<br>2.46)          | 1.67 (0.63,<br>4.30)     | 1.84 (0.69,<br>4.97)     | 1.73 (0.72,<br>4.25)     | 3.05 (0.78,<br>12.56)     | 1.26 (0.36,<br>4.44)     | 1.61 (0.53,<br>4.77)     | Bosutinib<br>500mg QD   | 0.18 (0.06,<br>0.49)                        |
| 5.12 (2.58,<br>10.33)   | 4.62 (1.91,<br>11.32)   | 9.41 (4.67,<br>19.54)    | 0.17 (0.06,<br>0.46) | 4.99 (2.41,<br>10.79)           | 5.68 (2.82,<br>11.80)         | 9.46 (3.77,<br>22.60)    | 10.34 (4.23,<br>25.73)   | 9.68 (4.36,<br>22.78)    | 17.57 (4.61,<br>68.96)    | 7.19 (2.11,<br>24.26)    | 9.09 (3.22,<br>25.82)    | 5.67 (2.04,<br>16.04)   | Imatinib<br>400mg QD<br>after IFN- $\alpha$ |

**(c) Progression to AP-CML**

|                        |                       |                        |                         |                                 |                               |                        |                        |                        |                       |                         |                        |
|------------------------|-----------------------|------------------------|-------------------------|---------------------------------|-------------------------------|------------------------|------------------------|------------------------|-----------------------|-------------------------|------------------------|
| Imatinib<br>400mg QD   | 0.14 (0.01,<br>1.64)  | 0.93 (0.27,<br>2.78)   | 2.00 (0.44,<br>8.68)    | 1.23 (0.26,<br>5.54)            | 0.75 (0.15,<br>3.13)          | 0.44 (0.09,<br>2.42)   | 0.26 (0.05,<br>1.35)   | 0.77 (0.16,<br>3.17)   | 0.20 (0.00,<br>2.04)  | 2.86 (0.55,<br>17.08)   | 1.13 (0.22,<br>5.18)   |
| 7.04 (0.61,<br>97.68)  | Imatinib<br>600mg QD  | 6.30 (0.40,<br>105.19) | 14.34 (0.77,<br>276.62) | 8.58 (0.47,<br>161.87)          | 5.17 (0.28,<br>98.46)         | 3.11 (0.25,<br>43.63)  | 1.83 (0.30,<br>13.08)  | 5.16 (0.28,<br>108.92) | 1.27 (0.02,<br>44.41) | 19.82 (0.99,<br>447.41) | 7.82 (0.40,<br>156.14) |
| 1.08 (0.36,<br>3.77)   | 0.16 (0.01,<br>2.50)  | Imatinib<br>800mg QD   | 2.13 (0.35,<br>15.36)   | 1.27 (0.30,<br>6.40)            | 0.79 (0.18,<br>3.55)          | 0.47 (0.07,<br>4.20)   | 0.27 (0.04,<br>2.37)   | 0.79 (0.13,<br>5.84)   | 0.22 (0.00,<br>3.08)  | 3.14 (0.41,<br>27.58)   | 1.19 (0.27,<br>6.15)   |
| 0.50 (0.12,<br>2.25)   | 0.07 (0.00,<br>1.29)  | 0.47 (0.07,<br>2.83)   | IFN + Ara-C             | 0.61 (0.07,<br>5.02)            | 0.37 (0.04,<br>2.90)          | 0.22 (0.03,<br>2.05)   | 0.13 (0.01,<br>1.26)   | 0.38 (0.04,<br>3.19)   | 0.10 (0.00,<br>1.58)  | 1.44 (0.16,<br>14.59)   | 0.57 (0.07,<br>4.97)   |
| 0.81 (0.18,<br>3.92)   | 0.12 (0.01,<br>2.13)  | 0.79 (0.16,<br>3.37)   | 1.63 (0.20,<br>14.31)   | Imatinib<br>400mg QD<br>+ Ara-C | 0.61 (0.12,<br>3.12)          | 0.37 (0.04,<br>3.79)   | 0.22 (0.02,<br>2.18)   | 0.62 (0.07,<br>5.54)   | 0.17 (0.00,<br>2.94)  | 2.41 (0.25,<br>25.68)   | 0.94 (0.17,<br>5.16)   |
| 1.34 (0.32,<br>6.52)   | 0.19 (0.01,<br>3.60)  | 1.27 (0.28,<br>5.70)   | 2.68 (0.34,<br>23.39)   | 1.63 (0.32,<br>8.60)            | Imatinib<br>400mg QD<br>+ IFN | 0.58 (0.07,<br>6.15)   | 0.34 (0.04,<br>3.61)   | 0.99 (0.12,<br>9.37)   | 0.28 (0.01,<br>4.37)  | 3.87 (0.43,<br>42.11)   | 1.49 (0.29,<br>8.35)   |
| 2.29 (0.41,<br>11.22)  | 0.32 (0.02,<br>3.98)  | 2.15 (0.24,<br>13.80)  | 4.61 (0.49,<br>39.87)   | 2.70 (0.26,<br>25.09)           | 1.72 (0.16,<br>14.37)         | Nilotinib<br>300mg BID | 0.58 (0.10,<br>3.23)   | 1.71 (0.18,<br>14.69)  | 0.46 (0.01,<br>6.99)  | 6.46 (0.61,<br>72.33)   | 2.52 (0.25,<br>23.41)  |
| 3.80 (0.74,<br>21.47)  | 0.55 (0.08,<br>3.38)  | 3.70 (0.42,<br>26.17)  | 7.80 (0.79,<br>70.07)   | 4.63 (0.46,<br>47.14)           | 2.97 (0.28,<br>26.48)         | 1.73 (0.31,<br>10.14)  | Nilotinib<br>400mg BID | 2.95 (0.30,<br>26.83)  | 0.78 (0.01,<br>13.94) | 11.08 (0.97,<br>127.61) | 4.24 (0.42,<br>42.86)  |
| 1.30 (0.32,<br>6.07)   | 0.19 (0.01,<br>3.54)  | 1.26 (0.17,<br>7.91)   | 2.65 (0.31,<br>23.37)   | 1.60 (0.18,<br>13.64)           | 1.01 (0.11,<br>8.21)          | 0.59 (0.07,<br>5.41)   | 0.34 (0.04,<br>3.37)   | Dasatinib<br>100mg QD  | 0.28 (0.01,<br>4.01)  | 3.86 (0.39,<br>39.06)   | 1.50 (0.16,<br>13.54)  |
| 4.93 (0.49,<br>202.49) | 0.79 (0.02,<br>57.89) | 4.54 (0.32,<br>202.43) | 10.04 (0.63,<br>501.16) | 5.98 (0.34,<br>301.55)          | 3.60 (0.23,<br>170.09)        | 2.18 (0.14,<br>124.83) | 1.29 (0.07,<br>72.78)  | 3.63 (0.25,<br>192.10) | Bosutinib<br>400mg QD | 14.54 (0.72,<br>851.44) | 5.60 (0.34,<br>293.59) |
| 0.35 (0.06,<br>1.82)   | 0.05 (0.00,<br>1.01)  | 0.32 (0.04,<br>2.46)   | 0.70 (0.07,<br>6.36)    | 0.41 (0.04,<br>3.98)            | 0.26 (0.02,<br>2.31)          | 0.15 (0.01,<br>1.63)   | 0.09 (0.01,<br>1.03)   | 0.26 (0.03,<br>2.53)   | 0.07 (0.00,<br>1.38)  | Bosutinib<br>500mg QD   | 0.39 (0.04,<br>3.87)   |
| 0.88 (0.19,<br>4.53)   | 0.13 (0.01,<br>2.47)  | 0.84 (0.16,<br>3.69)   | 1.77 (0.20,<br>15.35)   | 1.07 (0.19,<br>6.00)            | 0.67 (0.12,<br>3.43)          | 0.40 (0.04,<br>4.00)   | 0.24 (0.02,<br>2.39)   | 0.67 (0.07,<br>6.18)   | 0.18 (0.00,<br>2.98)  | 2.57 (0.26,<br>27.75)   | Ponatinib<br>45mg QD   |

(d) Serious AEs

|                         |                          |                          |                                 |                               |                          |                          |                          |                          |                          |                                             |
|-------------------------|--------------------------|--------------------------|---------------------------------|-------------------------------|--------------------------|--------------------------|--------------------------|--------------------------|--------------------------|---------------------------------------------|
| Imatinib<br>400mg QD    | 1.05 (0.01,<br>140.67)   | 1.22 (0.15,<br>9.09)     | 0.98 (0.04,<br>26.61)           | 1.03 (0.04,<br>27.99)         | 1.47 (0.04,<br>46.10)    | 1.42 (0.04,<br>53.72)    | 2.31 (0.17,<br>26.85)    | 1.68 (0.05,<br>64.95)    | 1.93 (0.06,<br>65.07)    | 0.07 (0.00,<br>2.92)                        |
| 0.95 (0.01,<br>168.63)  | Imatinib<br>600mg QD     | 1.18 (0.00,<br>308.38)   | 0.93 (0.00,<br>388.44)          | 0.98 (0.00,<br>472.16)        | 1.37 (0.00,<br>676.46)   | 1.38 (0.04,<br>51.24)    | 2.17 (0.01,<br>632.42)   | 1.56 (0.00,<br>1135.62)  | 1.85 (0.00,<br>803.69)   | 0.07 (0.00,<br>38.24)                       |
| 0.82 (0.11,<br>6.61)    | 0.85 (0.00,<br>224.67)   | Imatinib<br>800mg QD     | 0.79 (0.03,<br>21.90)           | 0.84 (0.03,<br>24.59)         | 1.19 (0.02,<br>73.30)    | 1.16 (0.02,<br>77.27)    | 1.88 (0.07,<br>48.85)    | 1.38 (0.03,<br>87.33)    | 1.63 (0.03,<br>91.20)    | 0.06 (0.00,<br>2.55)                        |
| 1.02 (0.04,<br>28.15)   | 1.08 (0.00,<br>444.53)   | 1.26 (0.05,<br>32.77)    | Imatinib<br>400mg QD<br>+ Ara-C | 1.07 (0.03,<br>37.93)         | 1.51 (0.01,<br>172.63)   | 1.47 (0.01,<br>181.33)   | 2.31 (0.03,<br>133.46)   | 1.71 (0.01,<br>230.79)   | 1.93 (0.02,<br>263.54)   | 0.07 (0.00,<br>4.23)                        |
| 0.97 (0.04,<br>25.33)   | 1.02 (0.00,<br>427.72)   | 1.20 (0.04,<br>32.28)    | 0.94 (0.03,<br>33.68)           | Imatinib<br>400mg QD<br>+ IFN | 1.40 (0.01,<br>168.76)   | 1.36 (0.01,<br>165.31)   | 2.14 (0.03,<br>140.34)   | 1.59 (0.01,<br>201.84)   | 1.90 (0.02,<br>222.33)   | 0.07 (0.00,<br>3.98)                        |
| 0.68 (0.02,<br>23.76)   | 0.73 (0.00,<br>365.65)   | 0.84 (0.01,<br>45.37)    | 0.66 (0.01,<br>86.03)           | 0.72 (0.01,<br>92.23)         | Nilotinib<br>300mg BID   | 0.97 (0.01,<br>158.26)   | 1.56 (0.02,<br>117.92)   | 1.17 (0.01,<br>178.92)   | 1.35 (0.01,<br>190.56)   | 0.05 (0.00,<br>8.02)                        |
| 0.70 (0.02,<br>25.48)   | 0.72 (0.02,<br>26.44)    | 0.86 (0.01,<br>56.64)    | 0.68 (0.01,<br>94.98)           | 0.73 (0.01,<br>106.83)        | 1.03 (0.01,<br>154.87)   | Nilotinib<br>400mg BID   | 1.63 (0.02,<br>141.02)   | 1.20 (0.01,<br>199.42)   | 1.34 (0.01,<br>221.67)   | 0.05 (0.00,<br>10.19)                       |
| 0.43 (0.04,<br>5.84)    | 0.46 (0.00,<br>129.13)   | 0.53 (0.02,<br>14.15)    | 0.43 (0.01,<br>29.32)           | 0.47 (0.01,<br>29.05)         | 0.64 (0.01,<br>49.30)    | 0.61 (0.01,<br>54.53)    | Dasatinib<br>100mg QD    | 0.76 (0.01,<br>55.63)    | 0.85 (0.01,<br>63.54)    | 0.03 (0.00,<br>2.88)                        |
| 0.60 (0.02,<br>18.74)   | 0.64 (0.00,<br>258.37)   | 0.73 (0.01,<br>38.32)    | 0.59 (0.00,<br>68.01)           | 0.63 (0.00,<br>72.94)         | 0.85 (0.01,<br>109.96)   | 0.84 (0.01,<br>120.89)   | 1.31 (0.02,<br>102.37)   | Bosutinib<br>400mg QD    | 1.16 (0.01,<br>145.60)   | 0.04 (0.00,<br>7.31)                        |
| 0.52 (0.02,<br>17.95)   | 0.54 (0.00,<br>257.95)   | 0.61 (0.01,<br>34.53)    | 0.52 (0.00,<br>59.85)           | 0.53 (0.00,<br>66.24)         | 0.74 (0.01,<br>108.62)   | 0.75 (0.00,<br>112.66)   | 1.18 (0.02,<br>87.45)    | 0.86 (0.01,<br>133.36)   | Bosutinib<br>500mg QD    | 0.04 (0.00,<br>6.10)                        |
| 13.73 (0.34,<br>932.45) | 14.87 (0.03,<br>9762.19) | 17.01 (0.39,<br>1280.81) | 13.44 (0.24,<br>1418.34)        | 14.68 (0.25,<br>1338.55)      | 20.66 (0.12,<br>4662.81) | 20.10 (0.10,<br>4702.10) | 31.57 (0.35,<br>4469.55) | 24.79 (0.14,<br>6757.74) | 27.25 (0.16,<br>6507.19) | Imatinib<br>400mg QD<br>after IFN- $\alpha$ |

(e) Overall discontinuation

|                       |                       |                       |                        |                                 |                               |                        |                        |                       |                        |                        |                       |                       |                                             |
|-----------------------|-----------------------|-----------------------|------------------------|---------------------------------|-------------------------------|------------------------|------------------------|-----------------------|------------------------|------------------------|-----------------------|-----------------------|---------------------------------------------|
| Imatinib<br>400mg QD  | 0.88 (0.19,<br>3.93)  | 1.51 (0.45,<br>5.00)  | 3.27 (0.36,<br>27.26)  | 7.40 (1.67,<br>31.59)           | 2.48 (0.61,<br>9.48)          | 1.00 (0.24,<br>4.27)   | 1.11 (0.29,<br>4.04)   | 0.81 (0.29,<br>2.47)  | 0.62 (0.07,<br>5.71)   | 1.80 (0.20,<br>15.76)  | 0.78 (0.10,<br>6.02)  | 1.64 (0.20,<br>13.52) | 2.43 (0.28,<br>21.28)                       |
| 1.14 (0.25,<br>5.36)  | Imatinib<br>600mg QD  | 1.73 (0.27,<br>11.55) | 3.64 (0.26,<br>52.14)  | 8.53 (1.40,<br>53.60)           | 2.80 (0.49,<br>16.27)         | 1.15 (0.16,<br>8.75)   | 1.27 (0.25,<br>6.28)   | 0.92 (0.15,<br>6.11)  | 0.72 (0.05,<br>10.65)  | 2.07 (0.15,<br>30.98)  | 0.87 (0.06,<br>11.75) | 1.86 (0.14,<br>26.05) | 2.80 (0.18,<br>41.42)                       |
| 0.66 (0.20,<br>2.20)  | 0.58 (0.09,<br>3.71)  | Imatinib<br>800mg QD  | 2.12 (0.16,<br>25.24)  | 4.89 (0.75,<br>31.65)           | 1.61 (0.31,<br>7.76)          | 0.66 (0.10,<br>4.22)   | 0.72 (0.13,<br>4.12)   | 0.53 (0.11,<br>2.71)  | 0.41 (0.03,<br>5.30)   | 1.18 (0.09,<br>13.84)  | 0.50 (0.05,<br>5.67)  | 1.05 (0.09,<br>13.13) | 1.60 (0.13,<br>19.68)                       |
| 0.31 (0.04,<br>2.79)  | 0.28 (0.02,<br>3.83)  | 0.47 (0.04,<br>6.07)  | IFN + Ara-C            | 2.34 (0.16,<br>32.78)           | 0.77 (0.06,<br>9.44)          | 0.31 (0.02,<br>4.31)   | 0.34 (0.03,<br>4.66)   | 0.25 (0.02,<br>3.14)  | 0.20 (0.01,<br>4.20)   | 0.55 (0.03,<br>12.03)  | 0.23 (0.01,<br>4.88)  | 0.50 (0.02,<br>10.86) | 0.76 (0.04,<br>16.99)                       |
| 0.14 (0.03,<br>0.60)  | 0.12 (0.02,<br>0.72)  | 0.20 (0.03,<br>1.33)  | 0.43 (0.03,<br>6.10)   | Imatinib<br>400mg QD<br>+ Ara-C | 0.33 (0.06,<br>1.92)          | 0.13 (0.02,<br>1.08)   | 0.15 (0.02,<br>0.97)   | 0.11 (0.02,<br>0.70)  | 0.08 (0.01,<br>1.25)   | 0.24 (0.02,<br>3.58)   | 0.10 (0.01,<br>1.34)  | 0.22 (0.02,<br>2.95)  | 0.33 (0.02,<br>4.75)                        |
| 0.40 (0.11,<br>1.63)  | 0.36 (0.06,<br>2.04)  | 0.62 (0.13,<br>3.19)  | 1.30 (0.11,<br>16.70)  | 2.99 (0.52,<br>17.95)           | Imatinib<br>400mg QD<br>+ IFN | 0.41 (0.06,<br>2.99)   | 0.44 (0.07,<br>2.70)   | 0.33 (0.06,<br>1.93)  | 0.26 (0.02,<br>3.58)   | 0.73 (0.06,<br>9.70)   | 0.31 (0.03,<br>3.90)  | 0.65 (0.05,<br>8.55)  | 0.98 (0.08,<br>13.83)                       |
| 1.00 (0.23,<br>4.20)  | 0.87 (0.11,<br>6.39)  | 1.53 (0.24,<br>10.09) | 3.25 (0.23,<br>43.22)  | 7.41 (0.92,<br>55.09)           | 2.47 (0.33,<br>16.18)         | Nilotinib<br>300mg BID | 1.10 (0.21,<br>5.80)   | 0.81 (0.13,<br>5.12)  | 0.62 (0.04,<br>8.92)   | 1.80 (0.13,<br>23.63)  | 0.77 (0.06,<br>8.75)  | 1.62 (0.12,<br>20.69) | 2.43 (0.19,<br>32.41)                       |
| 0.90 (0.25,<br>3.42)  | 0.79 (0.16,<br>3.93)  | 1.38 (0.24,<br>7.85)  | 2.91 (0.21,<br>37.00)  | 6.78 (1.03,<br>44.84)           | 2.25 (0.37,<br>13.74)         | 0.91 (0.17,<br>4.81)   | Nilotinib<br>400mg BID | 0.74 (0.14,<br>4.36)  | 0.56 (0.04,<br>7.61)   | 1.64 (0.12,<br>19.86)  | 0.69 (0.06,<br>8.19)  | 1.49 (0.12,<br>17.66) | 2.18 (0.18,<br>28.61)                       |
| 1.24 (0.40,<br>3.46)  | 1.08 (0.16,<br>6.65)  | 1.87 (0.37,<br>8.80)  | 3.93 (0.32,<br>43.34)  | 9.13 (1.44,<br>55.16)           | 3.01 (0.52,<br>16.56)         | 1.23 (0.20,<br>7.52)   | 1.35 (0.23,<br>7.28)   | Dasatinib<br>100mg QD | 0.78 (0.07,<br>9.14)   | 2.20 (0.19,<br>24.92)  | 0.94 (0.09,<br>9.74)  | 1.99 (0.19,<br>21.76) | 3.00 (0.26,<br>33.84)                       |
| 1.61 (0.18,<br>14.74) | 1.38 (0.09,<br>20.35) | 2.42 (0.19,<br>31.38) | 5.10 (0.24,<br>113.58) | 11.96<br>(0.80,<br>169.67)      | 3.90 (0.28,<br>54.59)         | 1.61 (0.11,<br>23.09)  | 1.78 (0.13,<br>23.73)  | 1.29 (0.11,<br>15.13) | Radotinib<br>300mg BID | 2.80 (0.32,<br>26.49)  | 1.21 (0.06,<br>24.09) | 2.61 (0.12,<br>56.10) | 3.84 (0.18,<br>87.89)                       |
| 0.55 (0.06,<br>4.94)  | 0.48 (0.03,<br>6.69)  | 0.85 (0.07,<br>10.74) | 1.82 (0.08,<br>36.39)  | 4.17 (0.28,<br>56.93)           | 1.38 (0.10,<br>17.29)         | 0.56 (0.04,<br>7.92)   | 0.61 (0.05,<br>8.16)   | 0.45 (0.04,<br>5.31)  | 0.36 (0.04,<br>3.13)   | Radotinib<br>400mg BID | 0.42 (0.02,<br>8.42)  | 0.91 (0.04,<br>18.97) | 1.38 (0.06,<br>26.60)                       |
| 1.29 (0.17,<br>10.48) | 1.15 (0.09,<br>15.41) | 2.00 (0.18,<br>21.72) | 4.26 (0.20,<br>90.70)  | 9.57 (0.75,<br>119.92)          | 3.20 (0.26,<br>38.52)         | 1.30 (0.11,<br>16.76)  | 1.44 (0.12,<br>17.92)  | 1.06 (0.10,<br>11.30) | 0.82 (0.04,<br>17.80)  | 2.36 (0.12,<br>49.39)  | Bosutinib<br>400mg QD | 2.14 (0.11,<br>43.17) | 3.23 (0.15,<br>64.24)                       |
| 0.61 (0.07,<br>5.00)  | 0.54 (0.04,<br>7.19)  | 0.95 (0.08,<br>11.01) | 1.98 (0.09,<br>42.11)  | 4.51 (0.34,<br>58.19)           | 1.53 (0.12,<br>18.28)         | 0.62 (0.05,<br>8.28)   | 0.67 (0.06,<br>8.17)   | 0.50 (0.05,<br>5.23)  | 0.38 (0.02,<br>8.02)   | 1.10 (0.05,<br>22.70)  | 0.47 (0.02,<br>9.25)  | Bosutinib<br>500mg QD | 1.49 (0.07,<br>33.32)                       |
| 0.41 (0.05,<br>3.58)  | 0.36 (0.02,<br>5.42)  | 0.62 (0.05,<br>7.53)  | 1.31 (0.06,<br>26.84)  | 3.04 (0.21,<br>41.09)           | 1.02 (0.07,<br>13.04)         | 0.41 (0.03,<br>5.40)   | 0.46 (0.03,<br>5.69)   | 0.33 (0.03,<br>3.82)  | 0.26 (0.01,<br>5.64)   | 0.73 (0.04,<br>16.26)  | 0.31 (0.02,<br>6.62)  | 0.67 (0.03,<br>14.24) | Imatinib<br>400mg QD<br>after IFN- $\alpha$ |

**(f) Discontinuation for drug-related AEs**

|                      |                      |                      |                       |                                 |                               |                        |                        |                       |                        |                        |                       |                       |                        |
|----------------------|----------------------|----------------------|-----------------------|---------------------------------|-------------------------------|------------------------|------------------------|-----------------------|------------------------|------------------------|-----------------------|-----------------------|------------------------|
| Imatinib<br>400mg QD | 1.04 (0.37,<br>3.25) | 2.32 (1.00,<br>5.25) | 3.25 (0.85,<br>12.64) | 4.94 (1.68,<br>12.42)           | 14.05 (4.15,<br>45.81)        | 1.28 (0.49,<br>3.88)   | 2.01 (0.94,<br>5.50)   | 1.42 (0.71,<br>2.81)  | 1.54 (0.30,<br>9.48)   | 4.14 (0.92,<br>21.57)  | 1.53 (0.43,<br>5.60)  | 4.18 (1.23,<br>16.04) | 8.86 (1.48,<br>87.98)  |
| 0.97 (0.31,<br>2.73) | Imatinib<br>600mg QD | 2.23 (0.57,<br>8.59) | 3.13 (0.56,<br>16.64) | 4.82 (1.27,<br>13.22)           | 13.59 (3.64,<br>45.20)        | 1.23 (0.31,<br>5.34)   | 1.94 (0.65,<br>6.77)   | 1.36 (0.35,<br>4.64)  | 1.49 (0.20,<br>11.59)  | 3.98 (0.59,<br>28.95)  | 1.47 (0.28,<br>7.50)  | 4.10 (0.71,<br>21.04) | 8.46 (0.98,<br>104.39) |
| 0.43 (0.19,<br>1.00) | 0.45 (0.12,<br>1.76) | Imatinib<br>800mg QD | 1.41 (0.29,<br>7.02)  | 2.14 (0.55,<br>7.18)            | 6.09 (1.37,<br>25.05)         | 0.55 (0.16,<br>2.27)   | 0.86 (0.29,<br>3.17)   | 0.61 (0.21,<br>1.77)  | 0.66 (0.11,<br>4.68)   | 1.79 (0.32,<br>11.04)  | 0.66 (0.15,<br>2.97)  | 1.82 (0.39,<br>9.21)  | 3.82 (0.54,<br>45.38)  |
| 0.31 (0.08,<br>1.17) | 0.32 (0.06,<br>1.77) | 0.71 (0.14,<br>3.43) | IFN + Ara-C           | 1.53 (0.26,<br>7.09)            | 4.34 (0.70,<br>25.58)         | 0.39 (0.08,<br>2.36)   | 0.62 (0.14,<br>3.32)   | 0.43 (0.09,<br>1.95)  | 0.47 (0.06,<br>4.88)   | 1.27 (0.16,<br>10.94)  | 0.47 (0.07,<br>3.10)  | 1.32 (0.20,<br>8.18)  | 2.77 (0.28,<br>38.49)  |
| 0.20 (0.08,<br>0.60) | 0.21 (0.08,<br>0.78) | 0.47 (0.14,<br>1.81) | 0.66 (0.14,<br>3.89)  | Imatinib<br>400mg QD<br>+ Ara-C | 2.80 (0.96,<br>10.34)         | 0.26 (0.07,<br>1.27)   | 0.40 (0.14,<br>1.75)   | 0.29 (0.09,<br>1.07)  | 0.31 (0.05,<br>2.61)   | 0.85 (0.15,<br>6.28)   | 0.31 (0.07,<br>1.71)  | 0.85 (0.18,<br>4.79)  | 1.81 (0.24,<br>23.29)  |
| 0.07 (0.02,<br>0.24) | 0.07 (0.02,<br>0.27) | 0.16 (0.04,<br>0.73) | 0.23 (0.04,<br>1.44)  | 0.36 (0.10,<br>1.04)            | Imatinib<br>400mg QD +<br>IFN | 0.09 (0.02,<br>0.50)   | 0.14 (0.04,<br>0.66)   | 0.10 (0.02,<br>0.41)  | 0.11 (0.01,<br>0.97)   | 0.30 (0.04,<br>2.28)   | 0.11 (0.02,<br>0.65)  | 0.30 (0.05,<br>1.75)  | 0.63 (0.07,<br>8.06)   |
| 0.78 (0.26,<br>2.03) | 0.81 (0.19,<br>3.24) | 1.81 (0.44,<br>6.40) | 2.55 (0.42,<br>13.30) | 3.90 (0.79,<br>13.75)           | 11.02 (2.01,<br>47.73)        | Nilotinib<br>300mg BID | 1.56 (0.54,<br>4.89)   | 1.11 (0.29,<br>3.55)  | 1.21 (0.16,<br>9.21)   | 3.24 (0.49,<br>21.49)  | 1.19 (0.22,<br>5.52)  | 3.34 (0.60,<br>15.91) | 6.80 (0.82,<br>87.32)  |
| 0.50 (0.18,<br>1.07) | 0.52 (0.15,<br>1.54) | 1.16 (0.32,<br>3.42) | 1.62 (0.30,<br>7.23)  | 2.48 (0.57,<br>7.38)            | 7.07 (1.51,<br>26.09)         | 0.64 (0.20,<br>1.87)   | Nilotinib<br>400mg BID | 0.71 (0.20,<br>1.90)  | 0.78 (0.11,<br>5.33)   | 2.07 (0.33,<br>12.57)  | 0.77 (0.14,<br>3.23)  | 2.12 (0.41,<br>8.98)  | 4.32 (0.54,<br>48.99)  |
| 0.70 (0.36,<br>1.41) | 0.73 (0.22,<br>2.84) | 1.64 (0.57,<br>4.83) | 2.31 (0.51,<br>11.21) | 3.50 (0.94,<br>10.59)           | 9.89 (2.42,<br>40.98)         | 0.90 (0.28,<br>3.41)   | 1.41 (0.53,<br>5.01)   | Dasatinib<br>100mg QD | 1.09 (0.19,<br>7.68)   | 2.97 (0.56,<br>17.20)  | 1.08 (0.25,<br>4.60)  | 2.97 (0.71,<br>13.61) | 6.29 (0.93,<br>73.09)  |
| 0.65 (0.11,<br>3.32) | 0.67 (0.09,<br>4.88) | 1.51 (0.21,<br>9.42) | 2.15 (0.21,<br>17.07) | 3.26 (0.38,<br>19.24)           | 9.24 (1.03,<br>70.63)         | 0.83 (0.11,<br>6.09)   | 1.29 (0.19,<br>9.15)   | 0.92 (0.13,<br>5.39)  | Radotinib<br>300mg BID | 2.65 (0.61,<br>12.05)  | 0.99 (0.12,<br>8.04)  | 2.70 (0.33,<br>21.78) | 5.75 (0.47,<br>95.73)  |
| 0.24 (0.05,<br>1.09) | 0.25 (0.03,<br>1.69) | 0.56 (0.09,<br>3.14) | 0.79 (0.09,<br>6.12)  | 1.18 (0.16,<br>6.83)            | 3.34 (0.44,<br>23.27)         | 0.31 (0.05,<br>2.06)   | 0.48 (0.08,<br>3.00)   | 0.34 (0.06,<br>1.80)  | 0.38 (0.08,<br>1.63)   | Radotinib<br>400mg BID | 0.37 (0.05,<br>2.62)  | 1.01 (0.14,<br>7.37)  | 2.14 (0.19,<br>32.08)  |
| 0.65 (0.18,<br>2.35) | 0.68 (0.13,<br>3.56) | 1.52 (0.34,<br>6.78) | 2.11 (0.32,<br>13.81) | 3.22 (0.58,<br>14.37)           | 9.04 (1.54,<br>51.21)         | 0.84 (0.18,<br>4.59)   | 1.31 (0.31,<br>6.98)   | 0.93 (0.22,<br>3.93)  | 1.01 (0.12,<br>8.68)   | 2.73 (0.38,<br>20.51)  | Bosutinib<br>400mg QD | 2.76 (0.45,<br>17.06) | 5.64 (0.64,<br>78.19)  |
| 0.24 (0.06,<br>0.81) | 0.24 (0.05,<br>1.40) | 0.55 (0.11,<br>2.54) | 0.76 (0.12,<br>4.94)  | 1.18 (0.21,<br>5.44)            | 3.28 (0.57,<br>18.97)         | 0.30 (0.06,<br>1.67)   | 0.47 (0.11,<br>2.43)   | 0.34 (0.07,<br>1.40)  | 0.37 (0.05,<br>3.05)   | 0.99 (0.14,<br>7.35)   | 0.36 (0.06,<br>2.23)  | Bosutinib<br>500mg QD | 2.05 (0.24,<br>30.14)  |
| 0.11 (0.01,<br>0.67) | 0.12 (0.01,<br>1.02) | 0.26 (0.02,<br>1.86) | 0.36 (0.03,<br>3.52)  | 0.55 (0.04,<br>4.20)            | 1.59 (0.12,<br>13.90)         | 0.15 (0.01,<br>1.22)   | 0.23 (0.02,<br>1.87)   | 0.16 (0.01,<br>1.07)  | 0.17 (0.01,<br>2.15)   | 0.47 (0.03,<br>5.25)   | 0.18 (0.01,<br>1.57)  | 0.49 (0.03,<br>4.19)  | Ponatinib<br>45mg QD   |



## Appendix 1 WinBUGS codes

“A” to “O” refer to each treatment.

A: Imatinib 400mg QD; B: Imatinib 600mg QD; C: Imatinib 800mg QD; D: IFN- $\alpha$  + Ara-C; E: Imatinib 400mg QD + Ara-C; F: Imatinib 400mg QD + IFN- $\alpha$ ; G: Nilotinib 300mg BID; H: Nilotinib 400mg BID; I: Dasatinib 100mg QD; J: Radotinib 300mg BID; K: Radotinib 400mg BID; L: Bosutinib 400mg QD; M: Bosutinib 500mg QD; N: Ponatinib 45mg QD; O: Imatinib 400mg QD after IFN- $\alpha$ .

For example: Consistency model for “MMR within 12 months”

```
model {
  for (i in 1:ns) {
    # Likelihood for each arm
    for (k in 1:na[i]) {
      r[i, k] ~ dbin(p[i, k], n[i, k])
      logit(p[i, k]) <- mu[i] + delta[i, k]
    }

    # Study-level relative effects
    # The arms are given in the order (arm_1, arm_2, ..., arm_{n_a-1}, arm_{n_a}).
    # The relative effects are parameterized as d[arm_1, arm_k].
    w[i, 1] <- 0
    delta[i, 1] <- 0
    for (k in 2:na[i]) { # parameterize multi-arm trials using a trick to avoid dnorm
      delta[i, k] ~ dnorm(md[i, k], taud[i, k])
      md[i, k] <- d[t[i, 1], t[i, k]] + sw[i, k]
      taud[i, k] <- tau.d * 2 * (k - 1) / k
      w[i, k] <- delta[i, k] - d[t[i, 1], t[i, k]]
      sw[i, k] <- sum(w[i, 1:k-1]) / (k - 1)
    }
  }

  # Relative effect matrix
  d[1,1] <- 0
  d[1,2] <- d.A.B
  d[1,3] <- d.A.C
  d[1,4] <- d.A.D
  d[1,5] <- d.A.E
  d[1,6] <- d.A.F
  d[1,7] <- d.A.G
  d[1,8] <- d.A.H
  d[1,9] <- d.A.I
  d[1,10] <- d.A.J
  d[1,11] <- d.A.K
}
```

d[1,12] <- d.A.L  
d[1,13] <- d.A.M  
d[1,14] <- d.A.N  
d[1,15] <- d.A.O  
d[2,1] <- -d.A.B  
d[2,2] <- 0  
d[2,3] <- -d.A.B + d.A.C  
d[2,4] <- -d.A.B + d.A.D  
d[2,5] <- -d.A.B + d.A.E  
d[2,6] <- -d.A.B + d.A.F  
d[2,7] <- -d.A.B + d.A.G  
d[2,8] <- -d.A.B + d.A.H  
d[2,9] <- -d.A.B + d.A.I  
d[2,10] <- -d.A.B + d.A.J  
d[2,11] <- -d.A.B + d.A.K  
d[2,12] <- -d.A.B + d.A.L  
d[2,13] <- -d.A.B + d.A.M  
d[2,14] <- -d.A.B + d.A.N  
d[2,15] <- -d.A.B + d.A.O  
d[3,1] <- -d.A.C  
d[3,2] <- d.A.B + -d.A.C  
d[3,3] <- 0  
d[3,4] <- -d.A.C + d.A.D  
d[3,5] <- -d.A.C + d.A.E  
d[3,6] <- -d.A.C + d.A.F  
d[3,7] <- -d.A.C + d.A.G  
d[3,8] <- -d.A.C + d.A.H  
d[3,9] <- -d.A.C + d.A.I  
d[3,10] <- -d.A.C + d.A.J  
d[3,11] <- -d.A.C + d.A.K  
d[3,12] <- -d.A.C + d.A.L  
d[3,13] <- -d.A.C + d.A.M  
d[3,14] <- -d.A.C + d.A.N  
d[3,15] <- -d.A.C + d.A.O  
d[4,1] <- -d.A.D  
d[4,2] <- d.A.B + -d.A.D  
d[4,3] <- d.A.C + -d.A.D  
d[4,4] <- 0  
d[4,5] <- -d.A.D + d.A.E  
d[4,6] <- -d.A.D + d.A.F  
d[4,7] <- -d.A.D + d.A.G  
d[4,8] <- -d.A.D + d.A.H  
d[4,9] <- -d.A.D + d.A.I  
d[4,10] <- -d.A.D + d.A.J

d[4,11] <- -d.A.D + d.A.K  
d[4,12] <- -d.A.D + d.A.L  
d[4,13] <- -d.A.D + d.A.M  
d[4,14] <- -d.A.D + d.A.N  
d[4,15] <- -d.A.D + d.A.O  
d[5,1] <- -d.A.E  
d[5,2] <- d.A.B + -d.A.E  
d[5,3] <- d.A.C + -d.A.E  
d[5,4] <- d.A.D + -d.A.E  
d[5,5] <- 0  
d[5,6] <- -d.A.E + d.A.F  
d[5,7] <- -d.A.E + d.A.G  
d[5,8] <- -d.A.E + d.A.H  
d[5,9] <- -d.A.E + d.A.I  
d[5,10] <- -d.A.E + d.A.J  
d[5,11] <- -d.A.E + d.A.K  
d[5,12] <- -d.A.E + d.A.L  
d[5,13] <- -d.A.E + d.A.M  
d[5,14] <- -d.A.E + d.A.N  
d[5,15] <- -d.A.E + d.A.O  
d[6,1] <- -d.A.F  
d[6,2] <- d.A.B + -d.A.F  
d[6,3] <- d.A.C + -d.A.F  
d[6,4] <- d.A.D + -d.A.F  
d[6,5] <- d.A.E + -d.A.F  
d[6,6] <- 0  
d[6,7] <- -d.A.F + d.A.G  
d[6,8] <- -d.A.F + d.A.H  
d[6,9] <- -d.A.F + d.A.I  
d[6,10] <- -d.A.F + d.A.J  
d[6,11] <- -d.A.F + d.A.K  
d[6,12] <- -d.A.F + d.A.L  
d[6,13] <- -d.A.F + d.A.M  
d[6,14] <- -d.A.F + d.A.N  
d[6,15] <- -d.A.F + d.A.O  
d[7,1] <- -d.A.G  
d[7,2] <- d.A.B + -d.A.G  
d[7,3] <- d.A.C + -d.A.G  
d[7,4] <- d.A.D + -d.A.G  
d[7,5] <- d.A.E + -d.A.G  
d[7,6] <- d.A.F + -d.A.G  
d[7,7] <- 0  
d[7,8] <- -d.A.G + d.A.H  
d[7,9] <- -d.A.G + d.A.I

d[7,10] <- -d.A.G + d.A.J  
d[7,11] <- -d.A.G + d.A.K  
d[7,12] <- -d.A.G + d.A.L  
d[7,13] <- -d.A.G + d.A.M  
d[7,14] <- -d.A.G + d.A.N  
d[7,15] <- -d.A.G + d.A.O  
d[8,1] <- -d.A.H  
d[8,2] <- d.A.B + -d.A.H  
d[8,3] <- d.A.C + -d.A.H  
d[8,4] <- d.A.D + -d.A.H  
d[8,5] <- d.A.E + -d.A.H  
d[8,6] <- d.A.F + -d.A.H  
d[8,7] <- d.A.G + -d.A.H  
d[8,8] <- 0  
d[8,9] <- -d.A.H + d.A.I  
d[8,10] <- -d.A.H + d.A.J  
d[8,11] <- -d.A.H + d.A.K  
d[8,12] <- -d.A.H + d.A.L  
d[8,13] <- -d.A.H + d.A.M  
d[8,14] <- -d.A.H + d.A.N  
d[8,15] <- -d.A.H + d.A.O  
d[9,1] <- -d.A.I  
d[9,2] <- d.A.B + -d.A.I  
d[9,3] <- d.A.C + -d.A.I  
d[9,4] <- d.A.D + -d.A.I  
d[9,5] <- d.A.E + -d.A.I  
d[9,6] <- d.A.F + -d.A.I  
d[9,7] <- d.A.G + -d.A.I  
d[9,8] <- d.A.H + -d.A.I  
d[9,9] <- 0  
d[9,10] <- -d.A.I + d.A.J  
d[9,11] <- -d.A.I + d.A.K  
d[9,12] <- -d.A.I + d.A.L  
d[9,13] <- -d.A.I + d.A.M  
d[9,14] <- -d.A.I + d.A.N  
d[9,15] <- -d.A.I + d.A.O  
d[10,1] <- -d.A.J  
d[10,2] <- d.A.B + -d.A.J  
d[10,3] <- d.A.C + -d.A.J  
d[10,4] <- d.A.D + -d.A.J  
d[10,5] <- d.A.E + -d.A.J  
d[10,6] <- d.A.F + -d.A.J  
d[10,7] <- d.A.G + -d.A.J  
d[10,8] <- d.A.H + -d.A.J

d[10,9] <- d.A.I + -d.A.J  
d[10,10] <- 0  
d[10,11] <- -d.A.J + d.A.K  
d[10,12] <- -d.A.J + d.A.L  
d[10,13] <- -d.A.J + d.A.M  
d[10,14] <- -d.A.J + d.A.N  
d[10,15] <- -d.A.J + d.A.O  
d[11,1] <- -d.A.K  
d[11,2] <- d.A.B + -d.A.K  
d[11,3] <- d.A.C + -d.A.K  
d[11,4] <- d.A.D + -d.A.K  
d[11,5] <- d.A.E + -d.A.K  
d[11,6] <- d.A.F + -d.A.K  
d[11,7] <- d.A.G + -d.A.K  
d[11,8] <- d.A.H + -d.A.K  
d[11,9] <- d.A.I + -d.A.K  
d[11,10] <- d.A.J + -d.A.K  
d[11,11] <- 0  
d[11,12] <- -d.A.K + d.A.L  
d[11,13] <- -d.A.K + d.A.M  
d[11,14] <- -d.A.K + d.A.N  
d[11,15] <- -d.A.K + d.A.O  
d[12,1] <- -d.A.L  
d[12,2] <- d.A.B + -d.A.L  
d[12,3] <- d.A.C + -d.A.L  
d[12,4] <- d.A.D + -d.A.L  
d[12,5] <- d.A.E + -d.A.L  
d[12,6] <- d.A.F + -d.A.L  
d[12,7] <- d.A.G + -d.A.L  
d[12,8] <- d.A.H + -d.A.L  
d[12,9] <- d.A.I + -d.A.L  
d[12,10] <- d.A.J + -d.A.L  
d[12,11] <- d.A.K + -d.A.L  
d[12,12] <- 0  
d[12,13] <- -d.A.L + d.A.M  
d[12,14] <- -d.A.L + d.A.N  
d[12,15] <- -d.A.L + d.A.O  
d[13,1] <- -d.A.M  
d[13,2] <- d.A.B + -d.A.M  
d[13,3] <- d.A.C + -d.A.M  
d[13,4] <- d.A.D + -d.A.M  
d[13,5] <- d.A.E + -d.A.M  
d[13,6] <- d.A.F + -d.A.M  
d[13,7] <- d.A.G + -d.A.M

```

d[13,8] <- d.A.H + -d.A.M
d[13,9] <- d.A.I + -d.A.M
d[13,10] <- d.A.J + -d.A.M
d[13,11] <- d.A.K + -d.A.M
d[13,12] <- d.A.L + -d.A.M
d[13,13] <- 0
d[13,14] <- -d.A.M + d.A.N
d[13,15] <- -d.A.M + d.A.O
d[14,1] <- -d.A.N
d[14,2] <- d.A.B + -d.A.N
d[14,3] <- d.A.C + -d.A.N
d[14,4] <- d.A.D + -d.A.N
d[14,5] <- d.A.E + -d.A.N
d[14,6] <- d.A.F + -d.A.N
d[14,7] <- d.A.G + -d.A.N
d[14,8] <- d.A.H + -d.A.N
d[14,9] <- d.A.I + -d.A.N
d[14,10] <- d.A.J + -d.A.N
d[14,11] <- d.A.K + -d.A.N
d[14,12] <- d.A.L + -d.A.N
d[14,13] <- d.A.M + -d.A.N
d[14,14] <- 0
d[14,15] <- -d.A.N + d.A.O
d[15,1] <- -d.A.O
d[15,2] <- d.A.B + -d.A.O
d[15,3] <- d.A.C + -d.A.O
d[15,4] <- d.A.D + -d.A.O
d[15,5] <- d.A.E + -d.A.O
d[15,6] <- d.A.F + -d.A.O
d[15,7] <- d.A.G + -d.A.O
d[15,8] <- d.A.H + -d.A.O
d[15,9] <- d.A.I + -d.A.O
d[15,10] <- d.A.J + -d.A.O
d[15,11] <- d.A.K + -d.A.O
d[15,12] <- d.A.L + -d.A.O
d[15,13] <- d.A.M + -d.A.O
d[15,14] <- d.A.N + -d.A.O
d[15,15] <- 0

# Study baseline priors
for (i in 1:ns) {
  mu[i] ~ dnorm(0, 1.769E-4)
}

```

```
# Variance prior
sd.d ~ dunif(0, 5.012E0)
tau.d <- pow(sd.d, -2)
```

```
# Effect parameter priors
d.A.B ~ dnorm(0, 1.769E-4)
d.A.C ~ dnorm(0, 1.769E-4)
d.A.D ~ dnorm(0, 1.769E-4)
d.A.E ~ dnorm(0, 1.769E-4)
d.A.F ~ dnorm(0, 1.769E-4)
d.A.G ~ dnorm(0, 1.769E-4)
d.A.H ~ dnorm(0, 1.769E-4)
d.A.I ~ dnorm(0, 1.769E-4)
d.A.J ~ dnorm(0, 1.769E-4)
d.A.K ~ dnorm(0, 1.769E-4)
d.A.L ~ dnorm(0, 1.769E-4)
d.A.M ~ dnorm(0, 1.769E-4)
d.A.N ~ dnorm(0, 1.769E-4)
```
