# Supplementary material for: Comparative efficacy and tolerability of front-line treatments for newly diagnosed chronic-phase chronic myeloid leukemia: an update network meta-analysis
Source: PubMed Central journal article supplement (PMC6714291; doi:10.1186/s12885-019-6039-9), 2019-08-28

## Additional file 2:

Figure S1 Risk of bias assessment (a) Risk of bias graph; (b) Risk of bias summary.

Figure S2 Rankograms for six outcomes (a) MMR within 12 months; (b) CCyR within 12 months; (c) Progression to AP-CML; (d) Serious AEs; (e) Overall discontinuation; (f) Discontinuation for drug-related AEs.

Figure S3 Funnel plots for six outcomes (a) MMR within 12 months; (b) CCyR within 12 months; (c) Progression to AP-CML; (d) Serious AEs; (e) Overall discontinuation; (f) Discontinuation for drug-related AEs.

### Figure S1 Risk of bias assessment

#### (a) Risk of bias graph

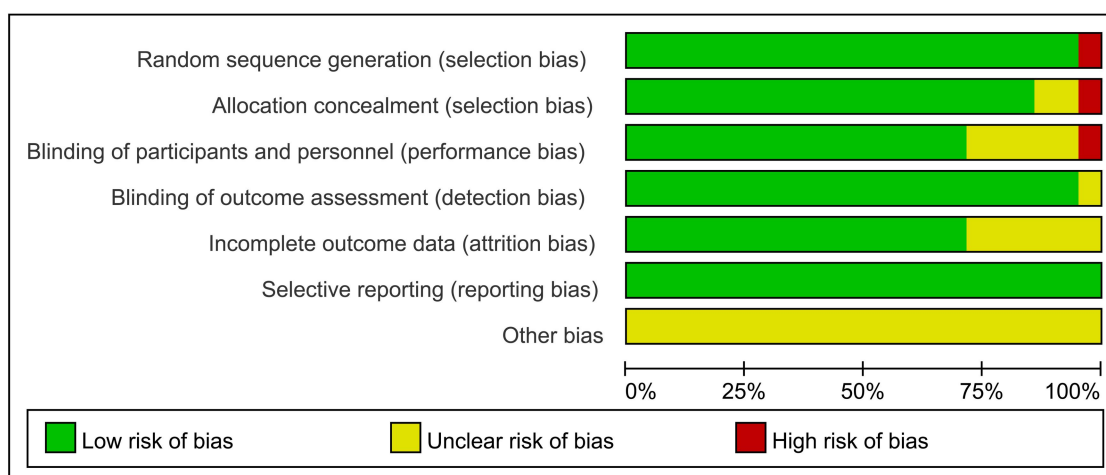

#### (b) Risk of bias summary

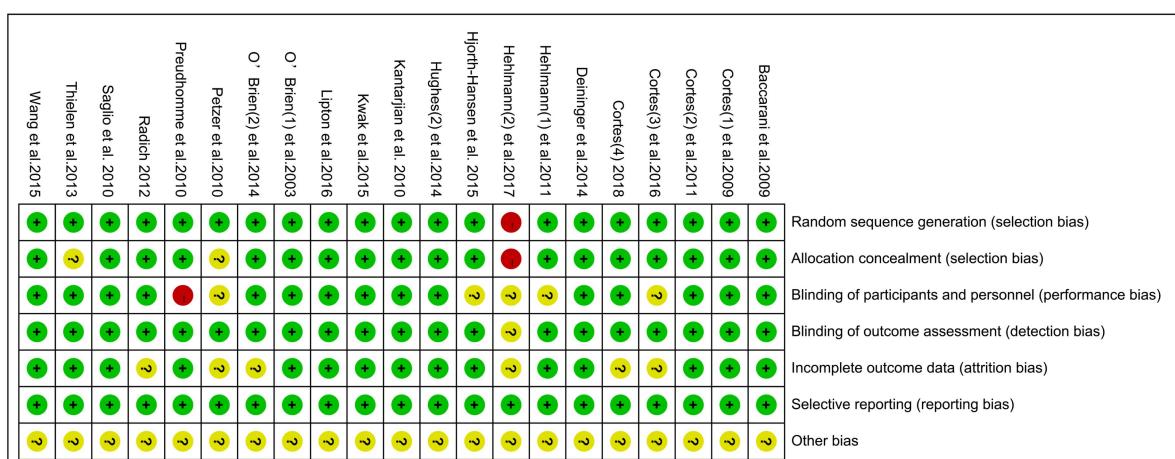

## Figure S2 Rankograms for six outcomes

“A” to “O” refer to each treatment. A: Imatinib 400mg QD; B: Imatinib 600mg QD; C: Imatinib 800mg QD; D: IFN- $\alpha$  + Ara-C; E: Imatinib 400mg QD + Ara-C; F: Imatinib 400mg QD + IFN- $\alpha$ ; G: Nilotinib 300mg BID; H: Nilotinib 400mg BID; I: Dasatinib 100mg QD; J: Radotinib 300mg BID; K: Radotinib 400mg BID; L: Bosutinib 400mg QD; M: Bosutinib 500mg QD; N: Ponatinib 45mg QD; O: Imatinib 400mg QD after IFN- $\alpha$ .

### (a) MMR within 12 months

#### Rank Probability

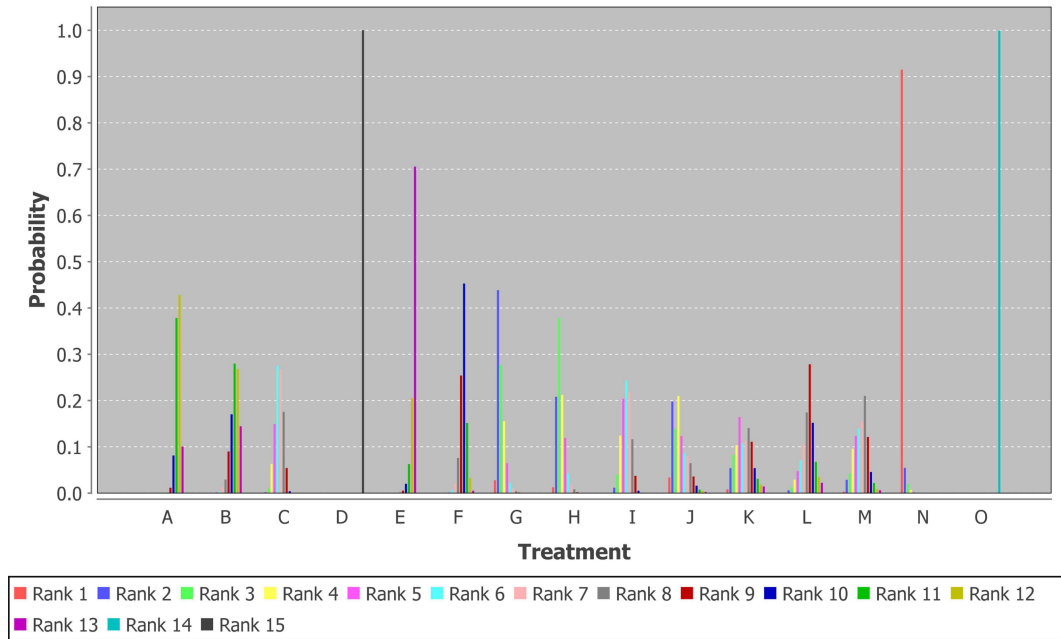

### (b) CCyR within 12 months

#### Rank Probability

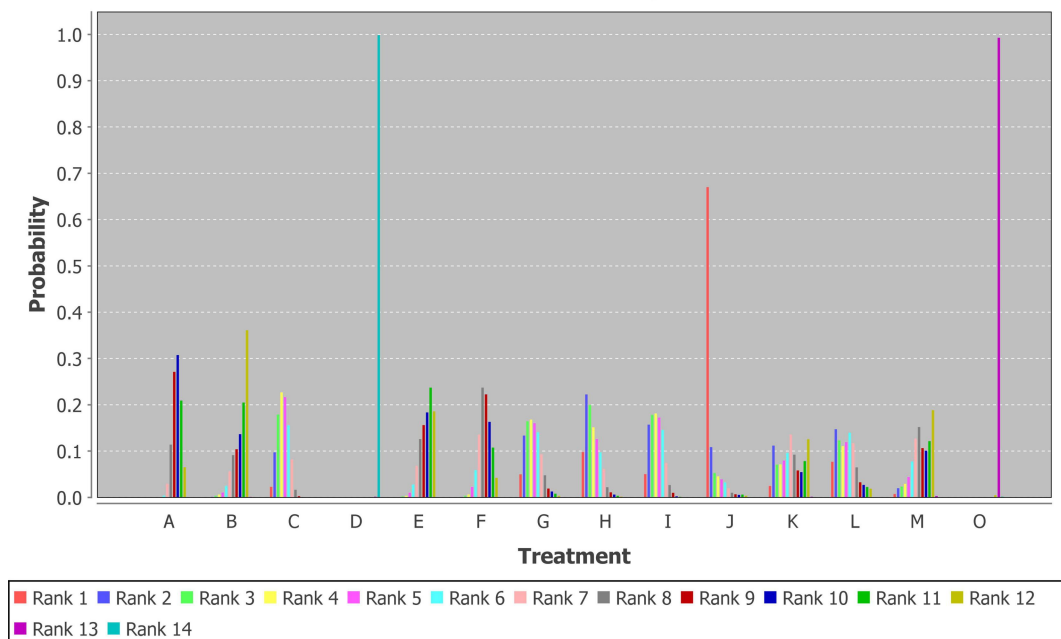





Figure S3 Funnel plots for six outcomes

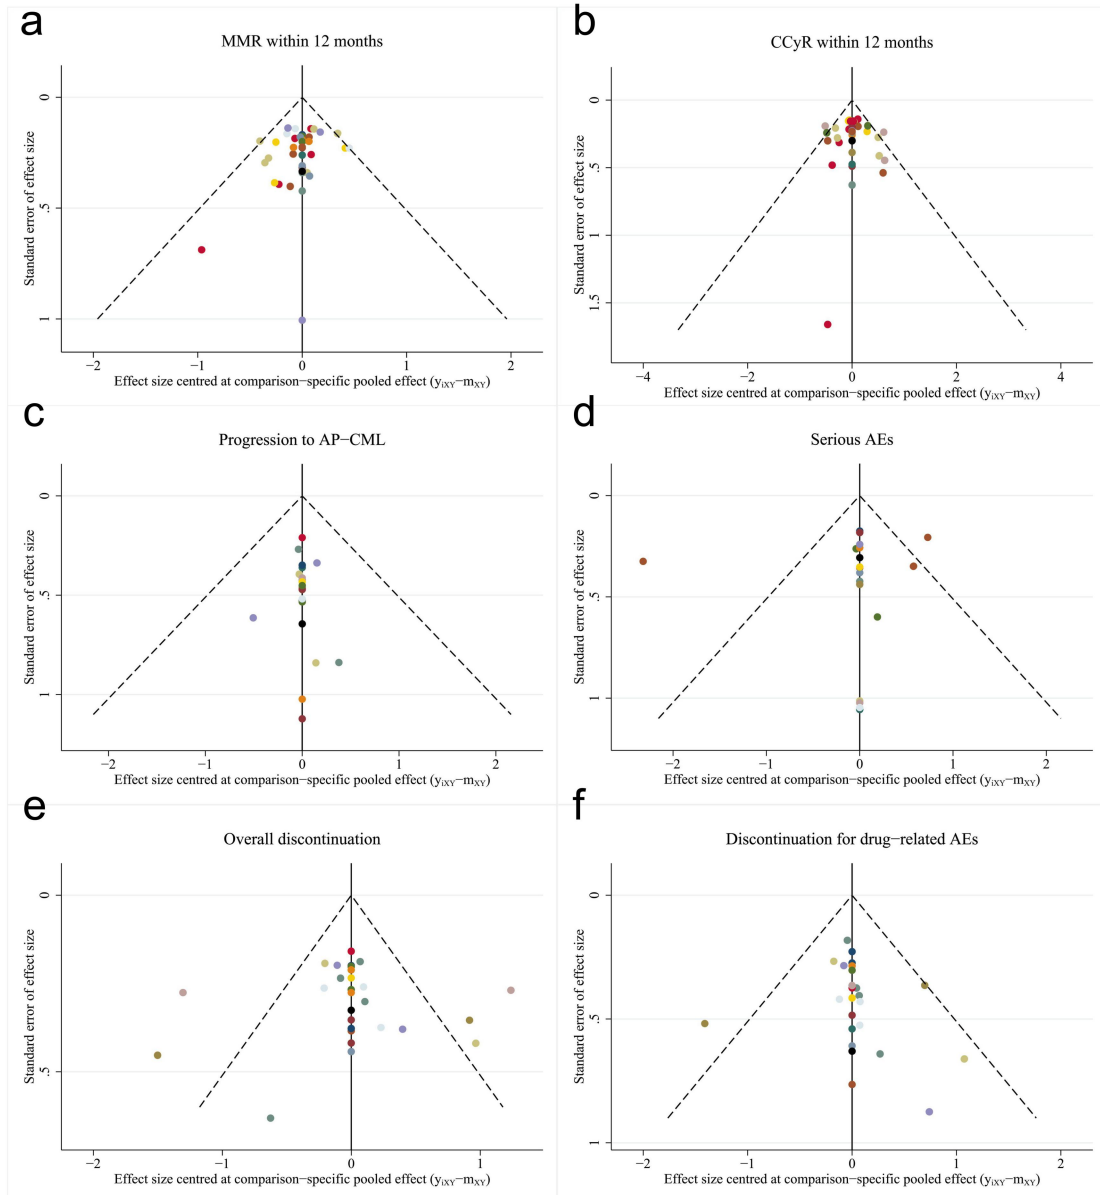

Supplement: 12885_2019_6039_MOESM2_ESM.pdf [file 12885_2019_6039_MOESM2_ESM.pdf]
